# Supplementary material
Source: PubMed Central journal article supplement (PMC6005768)
Supplement: NIHMS969052-supplement-2.pdf [file NIHMS969052-supplement-2.pdf]

Table S4. Medications and Devices Provided by Industry

| <b>MEDICATIONS AND DEVICES PROVIDED BY INDUSTRY</b> |                                                                                       |                                                                                                                                                                                                                                                                            |
|-----------------------------------------------------|---------------------------------------------------------------------------------------|----------------------------------------------------------------------------------------------------------------------------------------------------------------------------------------------------------------------------------------------------------------------------|
| <b>Company Name</b>                                 | <b>Product</b>                                                                        | <b>Country</b>                                                                                                                                                                                                                                                             |
| Abbott, Abbott Vascular                             | XIENCE Everolimus Eluting Coronary Stent System                                       | ALL                                                                                                                                                                                                                                                                        |
| Abbott<br>(previously St. Jude Medical)             | PressureWire™ Certus and PressureWire™ Aeris; RadiAnalyzer™ Xpress Measurement System | Argentina; Australia; Austria; Belgium; Brazil; Canada; China; Egypt; France; Hungary; India; Israel; Lithuania; Malaysia; Netherlands; New Zealand; Poland; Russia; Saudi Arabia; Serbia; Singapore; South Africa; Spain; Taiwan; Thailand; UK; United Arab Emirates; USA |
| Amgen                                               | Repatha® (evolocumab)                                                                 | Canada; Germany; Spain; USA                                                                                                                                                                                                                                                |
| Arbor Pharmaceuticals                               | Nitrolingual® Pumpspray (nitroglycerin lingual spray)                                 | Canada ( <i>distributor Pohl Boskamp</i> ); USA                                                                                                                                                                                                                            |
|                                                     | Edarbi® (azilsartan medoxomil)                                                        | USA                                                                                                                                                                                                                                                                        |
|                                                     | Edarbyclor® (azilsartan medoxomil/chlorthalidone)                                     | USA                                                                                                                                                                                                                                                                        |
| AstraZeneca                                         | Crestor® (rosuvastatin calcium)<br>Brilinta® (ticagrelor)                             | Brazil; Canada; China; Mexico; Singapore; USA                                                                                                                                                                                                                              |
| Espero Pharmaceuticals                              | GoNitro™ (nitroglycerin) sublingual powder                                            | USA                                                                                                                                                                                                                                                                        |
| Medtronic                                           | Resolute Integrity DES                                                                | ALL                                                                                                                                                                                                                                                                        |
| Merck & Co.                                         | Zetia® (ezetimibe)<br>Vytorin® (ezetimibe and simvastatin)                            | Argentina; Brazil; USA                                                                                                                                                                                                                                                     |
| Omron                                               | Pedometers                                                                            | ALL                                                                                                                                                                                                                                                                        |
| Philips<br>(previously Volcano Corporation)         | Prime Wire Prestige PLUS<br>Imaging Consoles                                          | Austria, Belgium, Canada, France, Germany, Italy, Japan, Netherlands, Poland, Portugal, South Africa, Spain, Sweden, UK, USA                                                                                                                                               |
| Sunovion Pharmaceuticals                            | Niaspan® (extended-release niacin)                                                    | Canada                                                                                                                                                                                                                                                                     |
