# Supplementary material
Source: PubMed Central journal article supplement (PMC6005768)
Supplement: NIHMS969052-supplement-3.pdf [file NIHMS969052-supplement-3.pdf]

Figure S2a. FFR Algorithm (stress imaging)

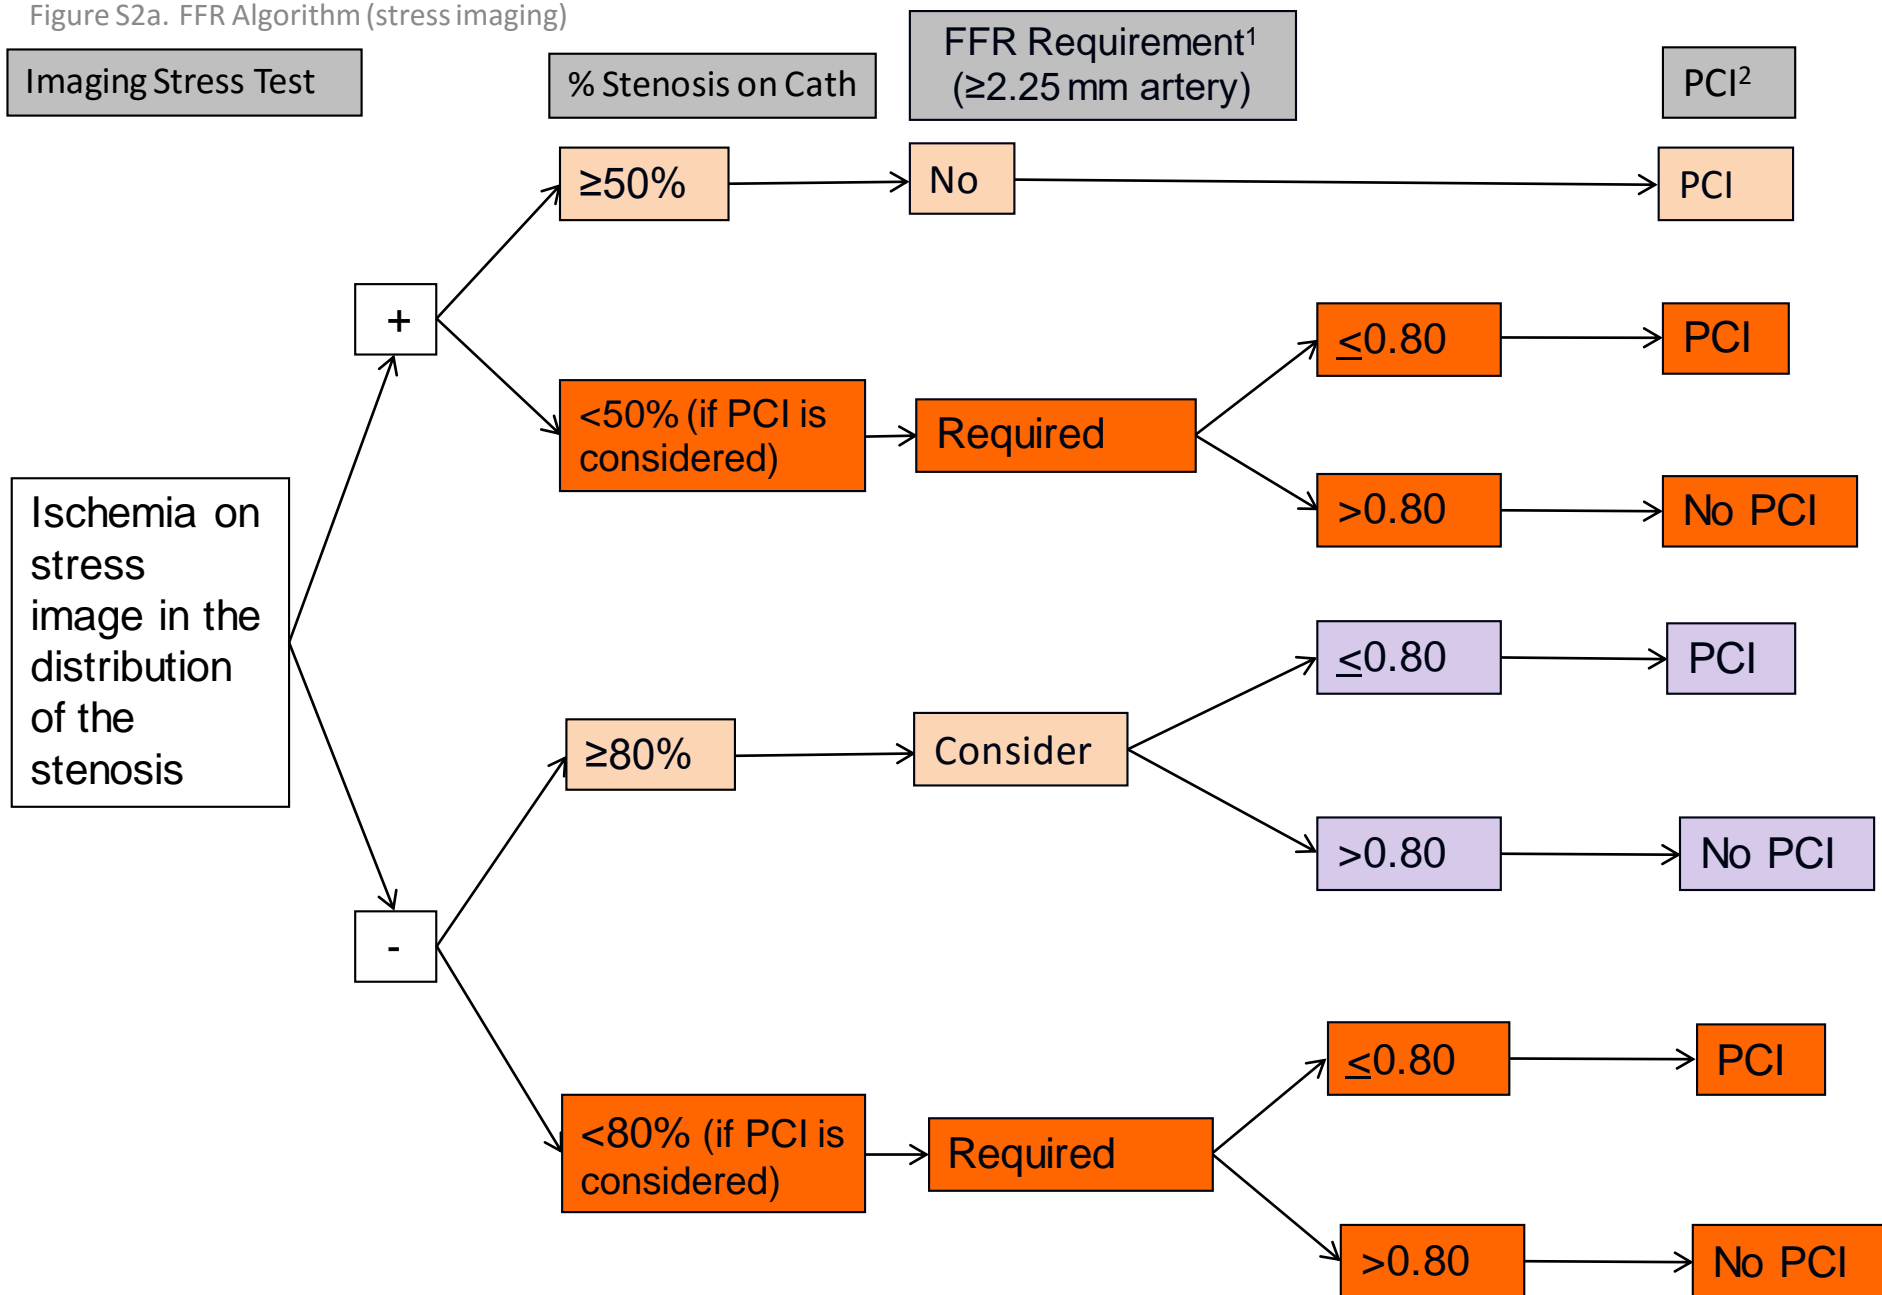

<sup>1</sup>The use of instantaneous wave-free ratio (iFR) instead of FFR (where available) was permitted, using a cutoff of  $\leq 0.89$  for physiologic significance.

<sup>2</sup>PCI based on anatomic feasibility and clinical considerations

Figure S2b. FFR Algorithm (ETT)

## For ETT Participants

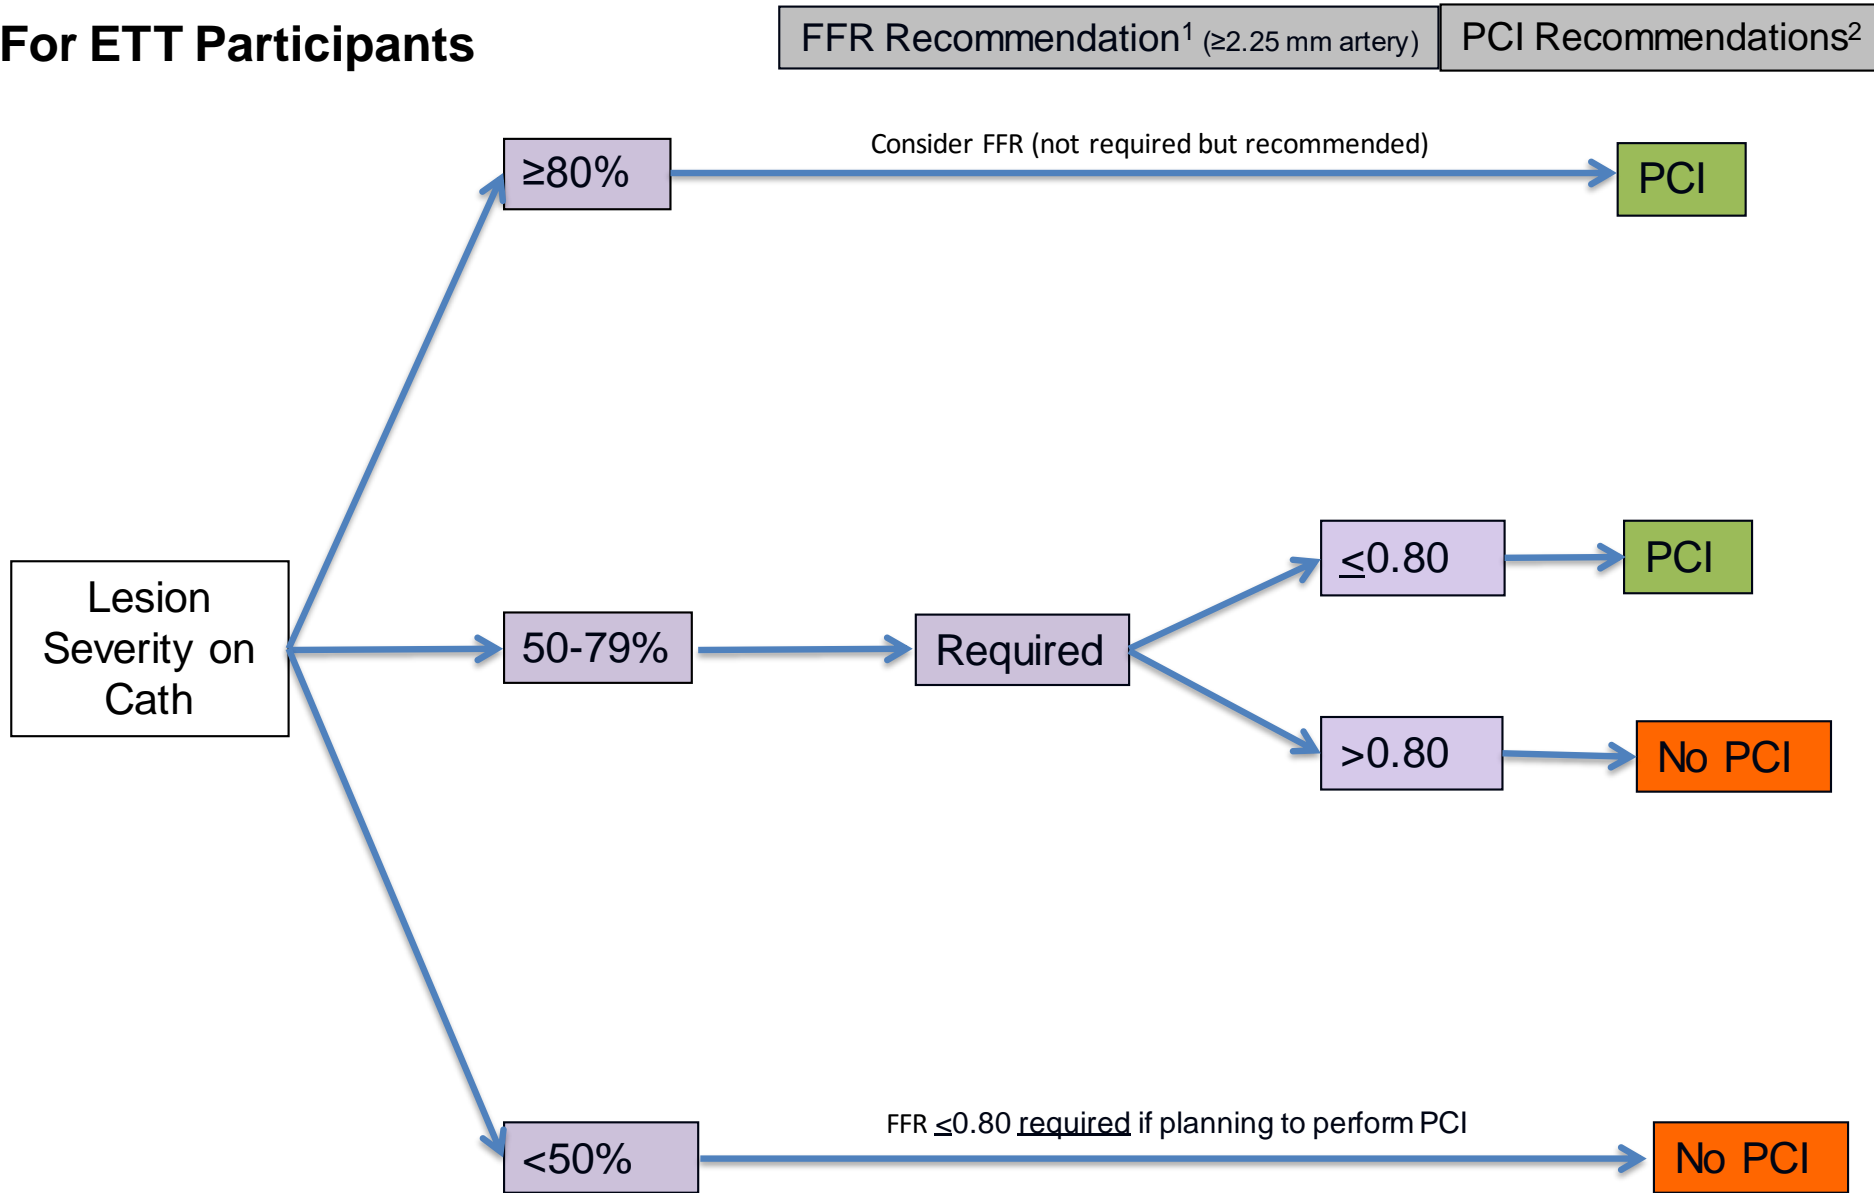

<sup>1</sup>The use of instantaneous wave-free ratio (iFR) instead of FFR (where available) was permitted, using a cutoff of ≤0.89 for physiologic significance.

<sup>2</sup>PCI based on anatomic feasibility and clinical considerations
