# Supplementary material
Source: PubMed Central journal article supplement (PMC6005768)
Supplement: NIHMS969052-supplement-4.pdf [file NIHMS969052-supplement-4.pdf]

Figure S1. OMT Algorithm

### ANGINA THERAPY

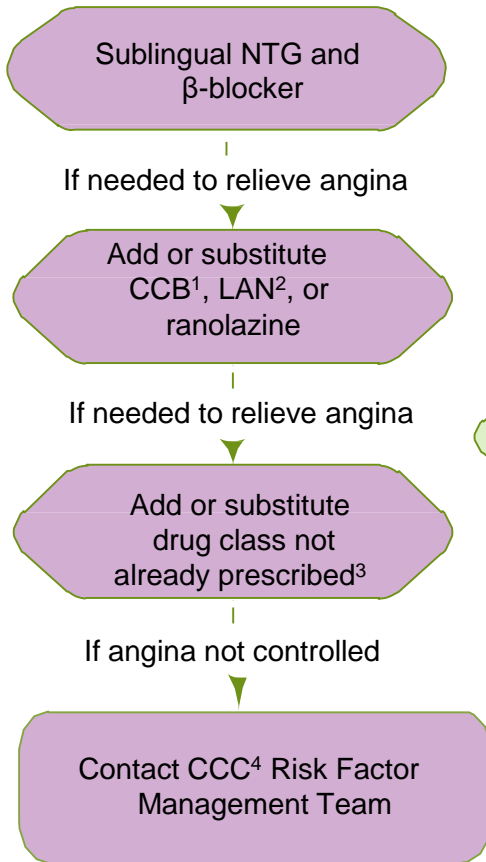

<sup>1</sup>CCB=calcium channel blocker  
<sup>2</sup>LAN=long-acting nitrate  
<sup>3</sup>Consider (not in order of preference): ivabradine, nicorandil, perhexiline, trimetazidine, where approved.  
<sup>4</sup>Clinical Coordinating Center

### LIPID LOWERING THERAPY Goal: LDLC <70mg/dL (1.8 mmol/L)

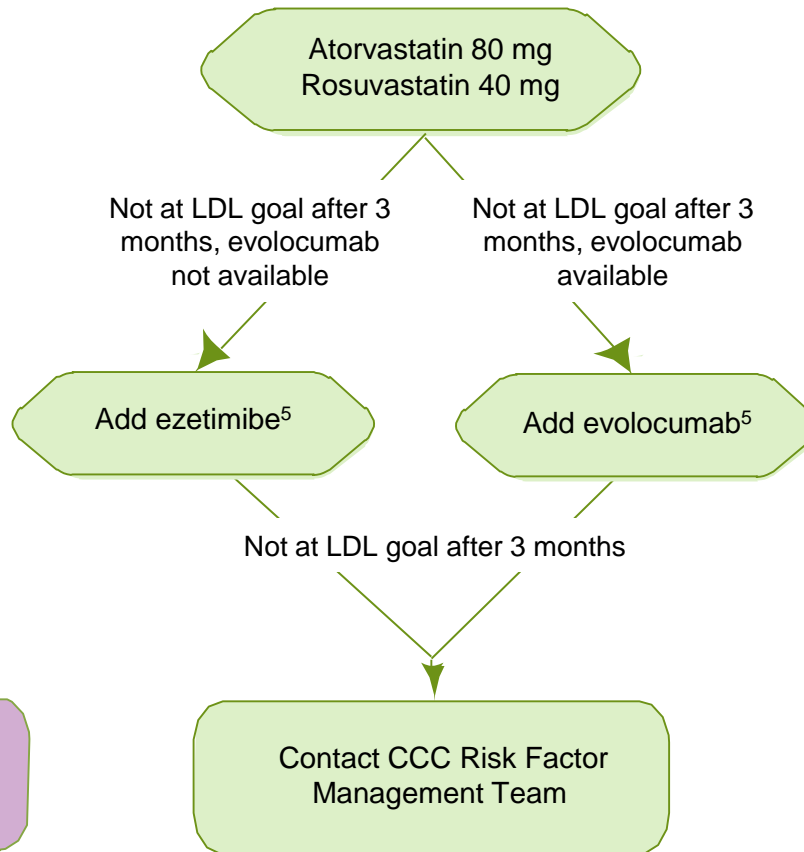

<sup>5</sup>Where available

### HYPERTENSION THERAPY Goal: Systolic BP <130 mmHg

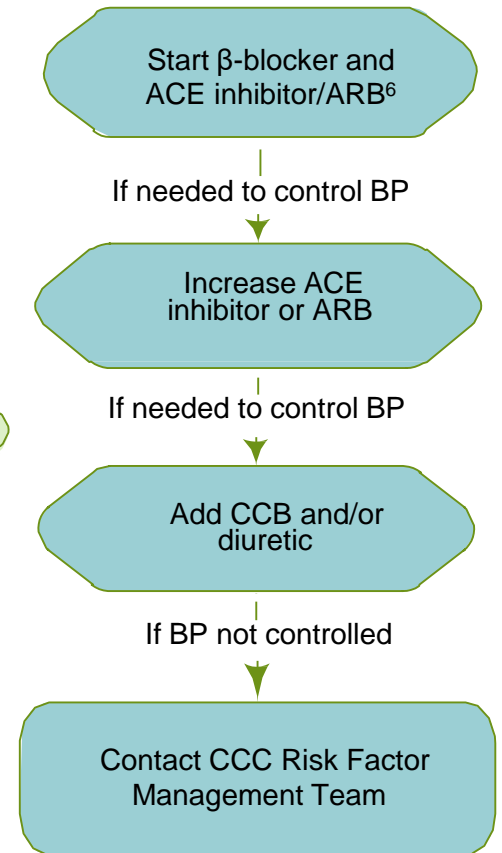

<sup>6</sup>ARB=angiotensin receptor blocker
