# Supplementary material
Source: PubMed Central journal article supplement (PMC6005768)
Supplement: NIHMS969052-supplement-7.pdf [file NIHMS969052-supplement-7.pdf]

## **Past and Current Committee Members**

### **Leadership Committee**

Judith S. Hochman (Chair)  
David J. Maron (Co-Chair)  
William Boden (Co-Principal Investigator)  
Bruce Ferguson (Co-Principal Investigator)  
Robert Harrington (Co-Principal Investigator)  
Gregg W. Stone (Co-Principal Investigator)  
David Williams (Co-Principal Investigator)

### **Executive Committee**

Judith S. Hochman (Chair)  
David J. Maron (Co-Chair)  
Karen P. Alexander  
Sripal Bangalore  
Jeffrey Berger  
William Boden  
Robert Harrington  
Daniel Mark  
Sean M. O'Brien  
Harmony R. Reynolds  
Yves Rosenberg  
Leslee J. Shaw  
John Spertus  
Gregg W. Stone

### **Steering Committee**

Judith S. Hochman (Chair)  
David J. Maron (Co-Chair)  
*Members of Executive Committee*  
Christie Ballantyne\*  
Daniel Berman  
Rafael Beyar\*  
Chris Buller\*  
Antonio (Tony) Carvalho\*  
Bernard R. Chaitman  
Rafael Diaz\*  
Rolf Doerr  
Vladimir Dzavik  
Bruce Ferguson  
Shaun Goodman  
Gilbert Gosselin  
Rory Hachamovitch\*  
Christian Hamm\*  
Claes Held  
Malte Helm\*  
Kurt Huber\*  
Lixin Jiang  
Matyas Keltai  
Shun Kohnsaka  
Irene Lang\*  
Renato Lopes  
Jose Lopez-Sendon  
Aldo Maggioni  
John Mancini  
C. Noel Bairey Merz  
James Min  
Eric Peterson\*  
Michael H. Picard  
Witold Ruzyllo  
Joseph Selvanayagam  
Roxy Senior  
Tali Sharir

Gabriel Steg  
Hanna Szwed  
Frans Van de Werf\*  
William Weintraub  
Harvey White  
David Williams

**Optimal Medical Therapy Committee**

William Boden (Co-Chair)  
David J. Maron (Co-Chair)  
Christie Ballantyne  
Sripal Bangalore  
Karen Calfas  
Bernard R. Chaitman  
Mary Ann Champagne  
Michael Davidson\*\*  
Jerome Fleg  
Peter A. McCullough  
Jonathan Newman  
Peter Stone

**Optimal Revascularization Therapy Planning Committee**

Gregg W. Stone (Chair)

**Subcommittee: CABG**

Bruce Ferguson (Co-Chair)  
Philippe Menasche (Co-Chair)  
Sripal Bangalore  
Michael Davidson\*\*  
Stephen Froles  
Robert Guyton  
Michael Mack  
Fred Mohr  
Anupama Rao  
Joe Sabik  
Oz Shapira  
David Taggart  
James Tatoulis

**Subcommittee: PCI**

David Williams (Co-Chair)  
Sripal Bangalore  
Jim Blankenship  
Sorin Brener  
Chris Buller  
Antonio Colombo  
Bernard de Bruyne  
Philippe G n reux  
Robert Harrington  
Dean Kereiakes  
Thierry Lefevre  
Jeffrey Moses

**Clinical Events**

**Endpoint Definition Panel**

Bernard R. Chaitman (Chair)  
Karen P. Alexander  
Judith S. Hochman  
Ken Mahaffey  
David J. Maron  
Gregg W. Stone  
Harvey White

**Clinical Event Review Committee**

Bernard R. Chaitman (Chair)  
Salvador Cruz-Flores

Nicholas Danchin

Eli Feen

Mario J. Garcia

Paul Hauptman

Abhay A. Laddu

Eugene Passamani

Ileana L. Pina

Maarten Simoons

Hicham Skali

Kristian Thygesen

David Waters

**CEC Administrative Group**

Karen P. Alexander

Patricia Endsley\*

Gerard Esposito

Jeffrey Kanters

John Pownall

Dimitrios Stournaras

**ISCHEMIA Imaging Committee**

Leslee J. Shaw (Chair)

Daniel Berman

Matthias Friedrich

Rory Hachamovitch

Raymond Kwong

John Mancini

James Min

Dana Oliver

Michael H. Picard

Harmony R. Reynolds

**Biostatistics Planning Committee**

Frank Harrell (Chair)

Jeffrey Blume

Kerry Lee

Sean M. O'Brien

**BioRepository Committee**

Jeffrey Berger (Chair)

Claes Held

Iftikhar Kullo

Bruce McManus

Kristin Newby

**EQOL Committee**

Daniel Mark (Co-Chair)

John Spertus (Co-Chair)

David Cohen

William Weintraub

**Recruitment for Women & Minorities**

C. Noel Bairey Merz (Chair)

Raffaele Bugiardini

Jelena Celutkiene

Jorge Escobedo

Angela Hoye

Radmila Lyubarova

Deirdre Mattina

Jesus Peteiro

Harmony R. Reynolds

Paola Smanio

**Publications**

David J. Maron (Chair)  
Karen P. Alexander  
Sripal Bangalore  
Jeffrey Berger  
William Boden  
Robert Harrington  
Judith S. Hochman  
Sean M. O'Brien  
Harmony R. Reynolds  
Yves Rosenberg  
Gregg W. Stone

**Publication Subcommittees**

**Economics**

Daniel Mark (Chair)  
John Spertus

**QOL**

John Spertus (Chair)  
Daniel Mark

**Stress Testing**

Leslee J. Shaw (Chair)  
Dan Berman  
Bernard R. Chaitman  
Jerome Fleg  
Raymond Kwong  
Michael H. Picard  
Harmony R. Reynolds  
Roxy Senior

**CCTA**

James Min (Chair)  
Jonathan Leipsic  
John Mancini

**Angiography**

Philippe Genereux (Co-Chair)  
Ziad Ali (Co-chair)  
Gregg W. Stone

**Optimal Revascularization Therapy**

Gregg W. Stone (Chair)  
Sripal Bangalore  
T. Bruce Ferguson  
David Williams

**Optimal Medical Therapy**

William Boden (Co-Chair)  
David J. Maron (Co-Chair)  
Jerome Fleg  
Jonathan Newman

**Biorepository**

Jeffrey Berger (Chair)

**CEC**

Bernard R. Chaitman (Chair)  
Karen P. Alexander

**CKD**

Sripal Bangalore (Chair)  
Karen P. Alexander  
Jerome Fleg  
Judith S. Hochman  
David J. Maron  
Roy Mathew  
Sean M. O'Brien  
Harmony R. Reynolds  
Mandeep Sidhu

**CIAO**

Harmony R. Reynolds (Chair)

### **DSMB Members**

Lawrence Friedman (Chair)  
Jeffrey Anderson  
Jessica Berg \*  
David DeMets  
C. Michael Gibson  
Gervasio Lamas  
Nicole Deming  
Jonathan Himmelfarb  
Pamela Ouyang  
Pamela Woodard

### **Independent Statistical Analysis Center for DSMB Reporting**

Frank Harrell  
Samuel Nwosu

### **NHLBI Program Staff**

#### **Project Office**

Yves Rosenberg (Project Officer)  
Jerome Fleg  
Ruth Kirby

#### **Statisticians**

Neal Jeffries

### **ISCHEMIA Clinical Coordinating Center (CCC)**

#### **Study Leadership**

Judith S. Hochman (Study Chair, Director of CCC)  
David J. Maron (Study Co-Chair, Co-Director of CCC, US Country Leader)

#### **CCC Faculty**

Sripal Bangalore (Optimal Revascularization Therapy CCC Director, Regional Leader)  
Jeffrey Berger (Director of the Biorepository, Regional Leader)  
William Boden (US-VA Regional Leader)  
Jonathan Newman (Optimal Medical Therapy CCC Director, Regional Leader)  
Harmony R. Reynolds (Associate Director of CCC, CCC Imaging Lead, Regional Leader)  
Mandeep Sidhu (US-VA Regional Co-Leader)

#### **Program Directors**

Jean E. Denaro\*\*  
Stephanie Mavromichalis

#### **Project Managers**

Gia Cobb  
Aira Contreras  
Diana Cukali  
Stephanie Ferket\*  
Andre Gabriel\*  
Antonietta Hansen  
Arline Roberts

#### **Clinical Research Associates**

Kevin Chan  
Graceanne Wayser  
Solomon Yakubov\*  
Michelle Yee

#### **Clinical Trial Assistants**

Sharder Islam  
Charlotte Pirro  
Vincent Setang  
Brianna Wisniewski

#### **Grants and Finance Administration**

Margaret Gilsenan  
Bevin Lang\*

#### **Publications Coordinator**

Jihyun Lyo

#### **Data Analyst**

Mark Xavier

### **Statistical and Data Coordinating Center (SDCC)**

Sean M. O'Brien (Principal Investigator)  
Karen P. Alexander (Co-Principal Investigator)  
Akshay Bagai\*  
Samuel Broderick  
Michelle Crowder  
Derek Cyr  
Patricia Endsley  
Xiangqiong Gu  
Robert Harrington\*  
Lisa Hatch  
Jeffrey Kanters  
Kerry Lee\*  
Courtney Page  
Wanda Parker\*  
Wayne Pennachi  
Frank Rockhold  
Dimitrios Stournaras  
Omar Thompson  
Sheri Ussery

### **Economics and Quality of Life Coordinating Center (EQOL CC)**

#### Duke Clinical Research Institute, Durham, NC

Daniel B. Mark (Principal Investigator)  
Kevin Anstrom  
Khaula Baloch  
Janet Blount  
Patricia Cowper  
Linda Davidson-Ray  
Laura Drew  
Tina Harding  
J David Knight  
Diane Minshall Liu  
Betsy O'Neal  
Thomas Redick

#### Saint Luke's Mid America Heart Institute, Kansas City, MO

John Spertus (Principal Investigator)  
Philip Jones  
Karen Nugent  
Grace Jingyan Wang

### **ISCHEMIA Imaging Coordinating Center (ICC)**

Leslee J. Shaw (Principal Investigator)  
Larry Phillips  
Abhinav Goyal  
Holly Hetrick  
Dana Oliver

#### Nuclear Core Lab

Daniel Berman (Director)  
Sean W. Hayes (Co-Director)  
John D. Friedman  
R. James Gerlach  
Mark Hyun  
Romalisa Miranda-Peats  
Piotr Slomka  
Louise Thomson

#### CMR Core Lab

Raymond Y. Kwong (Director)  
Matthias Friedrich (Director)\*

Francois Pierre Mongeon (Co-Director)

Steven Michael

Echo Core Lab

Michael H. Picard (Director)

Judy Hung

Marielle Scherrer-Crosbie

Xin Zeng

### **ECG/ETT CoreLab**

Bernard R. Chaitman (Director)

Jane Eckstein

Bandula Guruge

Mary Streif

### **Angiographic Core Lab**

Ziad Ali (Director)

Philippe Genereux (Director)\*

Maria A. Alfonso

Maria P. Corral

Javier J. Garcia

Jennifer Horst

Ivana Jankovic

Maayan Konigstein

Mitchel B. Lustre

Yolayfi Peralta

Raquel Sanchez

### **CCTA Core Lab**

James Min (Director)

Reza Arsanjani

Matthew Budoff

Kimberly Elmore

Millie Gomez

Cameron Hague

Niree Hindoyan

Jonathan Leipsic

GB John Mancini

Rine Nakanishi

M. Barbara Srichai-Parsia

Eunice Yeoh

Tricia Youn

### **Academic Research Organizations (AROs)**

Associazione Nazionale Medici Cardiologi Ospedalieri (ANMCO) -Italy & Switzerland

Aldo P. Maggioni (Country Leader)

Francesca Bianchini

Martina Ceseri

Andrea Lorimer

Marco Magnoni

Francesco Orso

Laura Sarti

Martinia Tricoli

Brazilian Clinical Research Institute (BCRI) - Brazil

Antonio Carvalho (Country Leader)

Renato Lopes (Country Leader)

Lilian Mazza Barbosa

Tauane Bello Duarte

Tamara Colaiácovo Soares

Flávia Egydio

Anelise Kawakami

Janaina Oliveira

Elissa Restelli Piloto

Jaqueline Pozzibon\*

Canadian Heart Research Centre (CHRC) - Canada

Shaun Goodman (Country Leader)

Diane Camara

Neamat Mowafy

Caroline Spindler

China Oxford Centre for International Health Research - China

Lixin Jiang (Country Leader)

Hao Dai

Fang Feng

Jia Li

Li Li

Jiamin Liu

Qiulan Xie

Haibo Zhang

Jianxin Zhang

Lihua Zhang

Liping Zhang

Ning Zhang

Hui Zhong

Estudios Clínicos Latino America (ECLA) - Argentina

Rafael Diaz\*

Claudia Escobar

Maria Eugenia Martin

Andrea Pascual

Foundation for Biomedical Research of La Paz University Hospital (FIBHULP) - Spain

José Lopez-Sendon (Country Leader)

Almudena Castro

Maria Posada

José Luis Narro Villanueva

French Alliance for Cardiovascular Trials (FACT) - France

Gabriel Steg (Country Leader)

Helene Abergel

Jean Michel Juliard

Green Lane Coordinating Centre Ltd. (GLCC) -Malaysia, New Zealand, Singapore, Taiwan, Thailand

Harvey White (Country Leader)

Caroline Alsweller

KU Leuven Research & Development - Belgium \*

Frans Van de Werf (Country Leader)

Kathleen Claes

Kaatje Goetschalckx

Ann Luyten

Valerie Robesyn

South Australian Health and Medical Research Institute Ltd (SAHMRI) - Australia

Joseph B. Selvanayagam (Country Leader)

Deirdre Murphy

**Contract Research Organizations (CROs) for ISCHEMIA Trial**

FOCUS Clinical Research Center d.o.o. Belgrade - Serbia

Nevena Garcevic

Jelena Stojkovic

iProcess Global Research Inc. - India

Asker Ahmed

Richa Bhatt

Nitika Chadha

Vijay Kumar

Sadath Lubna\*

Shruti Pandey

Karthik Ramasamy

Mohammed Saleem

Hemalata Siddaram

\*past members / past organizations

\*\*deceased
