# Supplementary material
Source: PubMed Central journal article supplement (PMC6005768)
Supplement: NIHMS969052-supplement-8.pdf [file NIHMS969052-supplement-8.pdf]

| Country<br>(No. Randomizations)                                                              | Investigator(s)                                                                                                                                                                          | Study Coordinator(s)                                                                                                                                                     | City & State<br>(if applicable) | Institution (No. Randomizations)                            |
|----------------------------------------------------------------------------------------------|------------------------------------------------------------------------------------------------------------------------------------------------------------------------------------------|--------------------------------------------------------------------------------------------------------------------------------------------------------------------------|---------------------------------|-------------------------------------------------------------|
| <b>*United States (853)</b>                                                                  |                                                                                                                                                                                          |                                                                                                                                                                          |                                 |                                                             |
| Country Leader<br>David J. Maron, MD<br>Regional Leader for VA Sites<br>William E. Boden, MD |                                                                                                                                                                                          |                                                                                                                                                                          |                                 |                                                             |
|                                                                                              | Kreton Mavromatis, MD<br>Jason Linefsky, MD                                                                                                                                              | John Doan, MD<br>Raven Lee, CCRP<br>Risha Patel                                                                                                                          | Decatur, GA                     | Atlanta VA Medical Center (139)                             |
|                                                                                              | Todd Miller, MD                                                                                                                                                                          | So Yang Cho<br>Susan Milbrandt<br>Dawn Shelstad                                                                                                                          | Rochester, MN                   | Mayo Clinic (50)                                            |
|                                                                                              | Subhash Banerjee, MD                                                                                                                                                                     | Preeti Kamath, BDS, MHA, CCRP<br>Ishita Tejani, BDS, MS, MSPH                                                                                                            | Dallas, TX                      | V.A. North Texas Health Care System (35)                    |
|                                                                                              | Harmony R. Reynolds, MD<br>Jonathan D. Newman, MD, MPH<br>Sripal Bangalore, MD<br>Robert M. Donnino, MD<br>Lawrence M. Phillips, MD<br>Muhamed Saric, MD, PhD                            | Stanley E. Cobos, BA<br>Kirsten J. Quiles, MS<br>Raven R. Dwyer, MPH<br>Dalisa Espinosa, MBS                                                                             | New York, NY                    | NYU Langone Medical Center-Bellevue Hospital (26)           |
|                                                                                              | Khaled Abdul-Nour, MD                                                                                                                                                                    | Allison Schley, BS<br>Heather Golden                                                                                                                                     | Detroit, MI                     | Henry Ford Health System (21)                               |
|                                                                                              | Peter H. Stone, MD                                                                                                                                                                       | Hermine Osseni, MS<br>Charlene Wiyarand<br>Peter Douglass, BA<br>Hayley Pomeroy, BA<br>Alexandra Craft, BA<br>Bethany Harvey, BA                                         | Boston, MA                      | Brigham & Women's Hospital, Harvard Medical School (21)     |
|                                                                                              | James J. Jang, MD<br>Gennie Yee, MD                                                                                                                                                      | Olivia Anaya<br>Phoebe Goold, RN                                                                                                                                         | San Jose, CA                    | Kaiser Permanente San Jose (18)                             |
|                                                                                              | Steven Weitz, MD                                                                                                                                                                         | Steven Giovannone<br>Lori Pritchard, RN                                                                                                                                  | Schenectady, NY                 | Cardiology Associates of Schenectady P.C. (17)              |
|                                                                                              | Suzanne Arnold, MD<br>James Henry O'Keefe, Jr, MD (PI from 2012-2016)                                                                                                                    | Rosann Gans, RN<br>Paul Kennedy, RN                                                                                                                                      | Kansas City, MO                 | Saint Luke's Hospital (17)                                  |
|                                                                                              | Michael D. Shapiro, DO                                                                                                                                                                   | Shobana Ganesan, PhD<br>David Schlichting, LPN<br>Aynun Naher                                                                                                            | Portland, OR                    | Oregon Health & Science University (17)                     |
|                                                                                              | Mohammad El-Hajjar, MD<br>Mandeep S. Sidhu, MD, MBA<br>Steven A. Fein, MD<br>Mikhail T. Torosoff, MD, PhD<br>Radmila Lyubarova, MD<br>Sulagna Mookherjee, MD<br>Krzysztof Drzymalski, MD | Wendy L. Stewart, MS<br>Kristin M. Salmi, BS                                                                                                                             | Albany, NY                      | Albany Medical Center Hospital (16)                         |
|                                                                                              | Edward O. McFalls, MD, PhD<br>Santiago A. Garcia, MD<br>Stefan C. Bertog, MD<br>Rizwan A. Siddiqui, MD<br>Areef Ishani, MD<br>Ronnell A. Hansen, MD                                      | Debra K. Johnson, RN<br>Rebekah R. Herrmann, RN                                                                                                                          | Minneapolis, MN                 | Minneapolis VAMC (15)                                       |
|                                                                                              | Michel Georges Khouri, MD                                                                                                                                                                | Kristine Arges<br>Melissa LeFevre<br>Jennifer Tomfohr                                                                                                                    | Durham, NC                      | Duke University Medical Center (15)                         |
|                                                                                              | Jonathan L. Goldberg, MS, MD                                                                                                                                                             | Kimberly Ann Byrne<br>Taissa Zappernick                                                                                                                                  | Cleveland, OH                   | Louis Stokes Cleveland Veterans Affairs Medical Center (14) |
|                                                                                              | Richard Goldweit, MD                                                                                                                                                                     | Sallie Canada<br>Meghana Kakade<br>Patricia Mieses                                                                                                                       | Englewood, NJ                   | Englewood Hospital and Medical Center (13)                  |
|                                                                                              | Ronny A. Cohen, MD<br>Brooks Mirrer, MD<br>Victor Navarro, MD                                                                                                                            | Stanley E. Cobos, BA<br>Raven R. Dwyer, MPH<br>Dalisa Espinosa, MBS<br>Kirsten J. Quiles, MS<br>Magdalena Rantinella, BS<br>Jessica Rodriguez, BS<br>Olivia Mancilla, BS | Brooklyn, NY                    | NYU-HHC Woodhull Hospital (12)                              |
|                                                                                              | David E. Winchester, MD, MS                                                                                                                                                              | Susan Stinson, RN                                                                                                                                                        | Gainesville, FL                 | Malcom Randall VAMC (11)                                    |
|                                                                                              | Marvin Kronenberg, MD<br>Philip Rogal, MD<br>Christopher McFarren, MD                                                                                                                    | Terry Weyand<br>Sherron C. Crook                                                                                                                                         | Nashville, TN                   | Vanderbilt University Medical Center (11)                   |
|                                                                                              | John F. Heitner, MD                                                                                                                                                                      | Jean Ho<br>Saadat Khan<br>Mahmoud Mohamed                                                                                                                                | Brooklyn, NY                    | New York -Presbyterian/Brooklyn Methodist Hospital (10)     |
|                                                                                              | Ira M. Dauber, MD                                                                                                                                                                        | Mary R. Soltau, RN<br>Delsa K. Rose, RN<br>Rebecca J. Wimmer, RN<br>Kathy E. Siegel, RN<br>Susan Derbyshire                                                              | Littleton, CO                   | South Denver Cardiology Associates, P.C. (10)               |
|                                                                                              | Charles Cannan, MD                                                                                                                                                                       | Michelle Dixon<br>Gerald Leonard                                                                                                                                         | Portland, OR                    | Providence Heart and Vascular Institute (10)                |
|                                                                                              | Sriram Sudarshan, MD                                                                                                                                                                     | Ciarra Heard, LVN<br>Viviana Gabriel, LVN<br>Sukie Desire                                                                                                                | Wichita Falls, TX               | Wichita Falls Heart Clinic (9)                              |
|                                                                                              | Puja K. Mehta, MD<br>Michael McDaniel, MD<br>Stamatiou Lerakis, MD<br>Arshed Quyyumi, MD<br>Nanette K. Wenger, MD                                                                        | Fauzia Rashid, PhD<br>Senait Asier<br>Keyur Patel                                                                                                                        | Atlanta, GA                     | Emory University (9)                                        |
|                                                                                              | Chester M. Hedgepeth, MD, PhD<br>Heather Hurlburt, MD<br>Alan Rosen, MD                                                                                                                  | Jennifer Gillis, APRN<br>Megan Manocchia, RN<br>Susan Moore, RN<br>Elizabeth Congdon                                                                                     | Warwick, RI                     | Kent Hospital (9)                                           |
|                                                                                              | Zakir Sahul, MD                                                                                                                                                                          | Gail Brandt<br>Nora Marchelletta<br>Kristina Wippler                                                                                                                     | Ypsilanti, MI                   | Michigan Heart, PC (9)                                      |
|                                                                                              | David Booth, MD<br>Steve Leung, MD<br>Ahmed Abdel-Latif, MD, PhD<br>Hassan Reda, MD<br>Khaled Ziada, MD                                                                                  | Yvonne Taul, RN<br>Jennifer Isaacs, MS<br>Viktoria Bulkley, RN<br>Caroline Rodgers                                                                                       | Lexington, KY                   | University of Kentucky (8)                                  |
|                                                                                              | Sampoornima Setty, MD                                                                                                                                                                    | Kimberly E. Halverson, RHIT<br>Christine Roraff, RN<br>Jonean Thorsen, RN                                                                                                | La Crosse, WI                   | Gundersen Lutheran Medical Center (8)                       |
|                                                                                              | Rajat S. Barua, MD, PhD                                                                                                                                                                  | Amarachi Ojajumi<br>Oni Olurinde<br>Kamalakar Surineni                                                                                                                   | Kansas City, MO                 | Kansas City VA Medical Center (8)                           |
|                                                                                              | Fadi Hage, MD<br>Christiano Caldeira, MD<br>James E. Davies, MD<br>Massoud Leesar, MD<br>Jaekyeong Heo, MD                                                                               | Badhma Valaiyapathi, MD                                                                                                                                                  | Birmingham, AL                  | UAB Vascular Biology and Hypertension Program (8)           |

| Country<br>(No. Randomizations) | Investigator(s)                                                                                                                                                                                                          | Study Coordinator(s)                                                                                              | City & State<br>(if applicable)     | Institution (No. Randomizations)                                                       |
|---------------------------------|--------------------------------------------------------------------------------------------------------------------------------------------------------------------------------------------------------------------------|-------------------------------------------------------------------------------------------------------------------|-------------------------------------|----------------------------------------------------------------------------------------|
|                                 | Amy Iskandrian, MD<br>Firas Al Solaiman, MD<br>Satinder Singh, MD<br>Khaled Daiani, MD                                                                                                                                   | Carol M. Kartje, BSN                                                                                              | Maywood, IL                         | Loyola University Medical Center (8)                                                   |
|                                 | Mohammad El-Hajjar, MD<br>Paul Der Mesropian, MD<br>Joseph Sacco, MD<br>Brian McCandless, MD<br>Marisa Orgera, MD<br>Mandeep S. Sidhu, MD, MBA (2012-2016)                                                               | Michele Rawlins, NP<br>Jennifer Thomson, MA                                                                       | Albany, NY                          | Samuel Stratton VA Medical Center of Albany NY (7)                                     |
|                                 | Imran Arif, MD<br>Hanan Kerr, MD                                                                                                                                                                                         | Mary Colleen Rogge, RN<br>Julie Bunke, BA<br>Kendra Unterbrink, PA<br>Jacqueline Fannon, RN<br>Cynthia Burman, NP | Cincinnati, OH                      | Cincinnati VA Medical Center (7)                                                       |
|                                 | Jorge F. Trejo (Gutierrez), MD<br>Gerald Fletcher, MD<br>Gary E. Lane, MD<br>Lynn M. Neeson, DNP<br>Pragnesh P. Parikh, MD<br>Peter M. Pollak, MD<br>Brian P. Shapiro, MD<br>Kevin Landolfo, MD                          | Marcia F. Dubin, CCRP                                                                                             | Jacksonville, FL                    | Mayo Clinic Florida (7)                                                                |
|                                 | Anthony Gemignani, MD<br>Daniel O'Rourke, MD                                                                                                                                                                             | Sarah Beaudry, RN                                                                                                 | White River Junction, VT            | VAMC-White River Junction (7)                                                          |
|                                 | Judith L. Meadows, MD                                                                                                                                                                                                    | Stephanie A. Tirado, RN<br>Janet Halliday<br>Pamela Julian                                                        | West Haven, CT                      | VA Connecticut Healthcare System (7)                                                   |
|                                 | Jason T. Call, MD                                                                                                                                                                                                        | Stephanie, M. Lane, RN, BSN, CCRN<br>Jennifer L. Stanford, RN, MSN                                                | Winchester, VA                      | Winchester Cardiology and Vascular Medicine, PC (7)                                    |
|                                 | Joseph Hannan, MD<br>Robert Bojar, MD<br>Deepthi Kumar, MD<br>John Mukai, MD                                                                                                                                             | Patricia Arsenaault, RN<br>Pamela Sigel, RN                                                                       | Worcester, MA                       | Saint Vincent Hospital at Worcester Medical Center (7)                                 |
|                                 | Edward T. Martin, MS, MD                                                                                                                                                                                                 | Miriam Brooks                                                                                                     | Tulsa, OK                           | Oklahoma Heart Institute (7)                                                           |
|                                 | Gabriel Vorobiof, MD                                                                                                                                                                                                     | Ladda Douangvila<br>Rubine Gevorgyan                                                                              | Los Angeles, CA                     | Ronald Reagan UCLA Medical Center (7)                                                  |
|                                 | Alec Moorman, MD                                                                                                                                                                                                         | Fatima Ranjbaran, RN<br>Bryn Smith, BS<br>Carly Ohmart                                                            | Seattle, WA                         | University of Washington Medical Center (7)                                            |
|                                 | Scott Kinlay, MBBS, PhD<br>Robert J. Hamburger, MD<br>Thomas P. Rocco, MD<br>Deepak L. Bhatt, MD, MPH<br>Kevin Croce, MD, PhD<br>Jacquelyn A. Quin, MD<br>Jati Anumpa, MD<br>Marco Zenati, MD, MSc<br>David P. Faxon, MD | Samantha Ly, MA<br>Margot C. Quinn, BA<br>Sara Temiyasathit, PhD<br>Jacquelyn Do, MPH<br>Desiree Tobin, MPH       | West Roxbury, MA                    | VA Boston Healthcare System (6)                                                        |
|                                 | Glenn Rayos, MD                                                                                                                                                                                                          | Jennifer Langdon<br>Marcia Werner Bayer                                                                           | Daytona Beach, FL                   | Daytona Heart Group (6)                                                                |
|                                 | Ashraf Seedhom, MD<br>Lance Sullenberger, MD                                                                                                                                                                             | Amanda O'Malley<br>Erin Orvis                                                                                     | Albany, NY                          | Capital Cardiology Associates (6)                                                      |
|                                 | Gregory Kumkumian, MD                                                                                                                                                                                                    | Mandy Murphy, RN<br>Ann Greenberg, RN<br>Margaret Iraola, RN                                                      | Bethesda, MD                        | NIH Heart Center at Suburban Hospital (6)                                              |
|                                 | Steven P. Sedlis, MD<br>Robert M. Donnino, MD<br>Jeffrey Lorin, MD<br>Jacqueline E. Tamis-Holland, MD                                                                                                                    | Leandro C. Maranan, CCRC                                                                                          | New York, NY                        | VA New York Harbor Health Care System (6)                                              |
|                                 | Robert Kornberg, MD<br>Robert Leber, MD<br>Souheil Saba, MD<br>Michael W. Lee, MD<br>Delano R. Small, MD<br>Wassim Nona, MD<br>Patrick B. Alexander, MD<br>Iram Rehman, MD                                               | Ammy Malinay, RN<br><br>Candice P. Edillo, RN                                                                     | Ridgewood, NJ<br><br>Southfield, MI | Mount Sinai Saint Luke's Hospital (6)<br><br>Providence - Providence Park Hospital (6) |
|                                 | Umesh Badami, MD                                                                                                                                                                                                         | Ann Ostrander, RN<br>Stephanie Wasmiller, RN                                                                      | Saginaw, MI                         | Covenant Medical Center, Inc. (5)                                                      |
|                                 | Kevin Marzo, MD                                                                                                                                                                                                          | Wendy Drewes, RN<br>Dipti Patel, RN                                                                               | Mineola, NY                         | NYU Winthrop (5)                                                                       |
|                                 | Inga H. Robbins, MD<br>Howard A. Levite, MD<br>Sanjay Shetty, MD<br>Mayuri Patel, MD                                                                                                                                     | Jackie M White, RN, BSN CCRC<br>Alison Hallam                                                                     | Pomona, NJ                          | AtlantiCare Regional Medical Center (5)                                                |
|                                 | Glenn S. Hamroff, MD                                                                                                                                                                                                     | Benjamin J Spooner, RPA-C<br>Linda M Hollenweger, LPN, CCRC                                                       | Cortlandt Manor, NY                 | NYP Medical Medical Group Hudson Valley Cardiology (5)                                 |
|                                 | Raymond W. Little, MD<br>Brandi D. Zimbelman, FNP-C                                                                                                                                                                      | Holly Little<br>Tiffany Little                                                                                    | Houston, TX                         | Houston Heart & Vascular Associates (5)                                                |
|                                 | Charles Y. Lui, MD<br>Brigham R. Smith, MD<br>Daniel P. Vezina, MD, MSc<br>Lillian L. Khor, MBBCh, MSc<br>Josephine D. Abraham, MD, MPH<br>David A. Bull, MD<br>Stephen H. McKellar, MD, MSc                             | Nona A Eskelson, RN                                                                                               | Salt Lake City, UT                  | Salt Lake City VA Medical Center (4)                                                   |
|                                 | David Booth, MD<br>John Kotter, MD<br>Ahmed Abdel-Latif, MD, PhD                                                                                                                                                         | Yvonne Taul, RN<br>Caroline Rodgers, RN<br>Jennifer Isaacs, MS<br>Viktoria Bulkley<br>Renee Kaneshiro             | Lexington, KY                       | Lexington VA Medical Center (4)                                                        |
|                                 | Bob Hu, MD                                                                                                                                                                                                               | Renee Kaneshiro                                                                                                   | Palo Alto, CA                       | Palo Alto Medical Foundation Research Institute (4)                                    |
|                                 | Arthur J. Labovitz, MD<br>Michael Berlowitz, MD<br>Phillip Rogal, MD<br>Christopher McFarren, MD<br>Fadi Matar, MD<br>Christiano Caldeira, MD                                                                            | Bonnie J. Kirby, RN, MSN<br>Nhi N. Tran, MS<br>Catherine Jahrsdorfer, RN, BSN                                     | Tampa, FL                           | University of South Florida (4)                                                        |
|                                 | David J. Maron, MD<br>Fatima Rodriguez, MD, MPH<br>Ingela Schnittger, MD<br>William F. Fearon, MD                                                                                                                        | Reem Yunis, PhD<br>Jhina Patro                                                                                    | Stanford, CA                        | Stanford University School of Medicine (4)                                             |
|                                 | Prakash Deedwania, MD<br>Kiran Reddy, MD                                                                                                                                                                                 | Antonia Vega                                                                                                      | Fresno, CA                          | UCSF - Fresno Community Regional Medical Center (4)                                    |
|                                 | Joseph Sweeny, MD                                                                                                                                                                                                        | Hugo Bloise-Adames<br>Santa Jimenez<br>Nicole Saint Vrestil<br>Revna Bhandari                                     | New York, NY                        | Icahn School of Medicine at Mount Sinai (4)                                            |
|                                 | Christopher Spizzieri, MD                                                                                                                                                                                                | Danielle Schade                                                                                                   | Camp Hill, PA                       | Holy Spirit Hospital Cardiovascular Institute (4)                                      |

| Country<br>(No. Randomizations) | Investigator(s)                                                                                                                                                                                                                                     | Study Coordinator(s)                                                                                                                                                                                         | City & State<br>(if applicable)                             | Institution (No. Randomizations)                                                                                                                |
|---------------------------------|-----------------------------------------------------------------------------------------------------------------------------------------------------------------------------------------------------------------------------------------------------|--------------------------------------------------------------------------------------------------------------------------------------------------------------------------------------------------------------|-------------------------------------------------------------|-------------------------------------------------------------------------------------------------------------------------------------------------|
|                                 |                                                                                                                                                                                                                                                     | Roxanne Yost                                                                                                                                                                                                 |                                                             |                                                                                                                                                 |
|                                 | Claudia P Hochberg, MD                                                                                                                                                                                                                              | Paula Beardsley<br>Denise Fine                                                                                                                                                                               | Boston, MA                                                  | Boston Medical Center (4)                                                                                                                       |
|                                 | William D. Salerno, MD                                                                                                                                                                                                                              | Jana Tancredi, RN, MA/MSN, CCRN<br>Patricia Arakelian<br>Susan Mathus<br>Deborah O'Neill                                                                                                                     | Saddle Brook, NJ                                            | Hackensack University Medical Center (4)                                                                                                        |
|                                 | Ray Wyman, MD                                                                                                                                                                                                                                       | Joy Burkhardt, CCRP<br>Suellen Hosino, RN, BSN, CCRP                                                                                                                                                         | Torrance, CA                                                | Torrance Memorial Medical Center (4)                                                                                                            |
|                                 | Amer Zarka, MD<br>Anil V. Shah, MD                                                                                                                                                                                                                  | Oksana A. Lubyanyaya, BA<br>Jose D. Salas, BS<br>Maria Aguirre<br>Manu Dhawan<br>Diana Parra<br>Tri Tran                                                                                                     | Santa Ana, CA                                               | Coastal Heart Medical Group (4)                                                                                                                 |
|                                 | Thomas Haldis, DO                                                                                                                                                                                                                                   | Catherine Weick, BSRT(R)(VT)<br>Katie Fowler-Lehman, BSN<br>Natalie Spitzer, BSN<br>Casey Riedberger<br>Catherine Weick                                                                                      | Fargo, ND                                                   | Sanford Health (4)                                                                                                                              |
|                                 | Jeffrey A. Kohn, MD                                                                                                                                                                                                                                 | Stanley E. Cobos, BA<br>Raven R. Dwyer, MPH<br>Dalisa Espinosa, MBS<br>Kirsten J. Quiles, MS                                                                                                                 | New York, NY                                                | NYU New York Medical Associates (4)                                                                                                             |
|                                 | Saket Girotra, MD                                                                                                                                                                                                                                   | Carrie Drum, RN<br>Kimberly Miller-Cox, RN<br>Amy Ollinger, RN                                                                                                                                               | Iowa City, IA                                               | University of Iowa Hospitals and Clinics (4)                                                                                                    |
|                                 | Omar Almousalli, MD                                                                                                                                                                                                                                 | Elizabeth Capasso-Gulve<br>Alaine Melanie Loehr<br>Marlowe Mosley                                                                                                                                            | Fairview Heights, IL                                        | Advanced Heart Care Group (4)                                                                                                                   |
|                                 | Mayil S. Krishnam, MD<br>Jeffrey C. Milliken, MD<br>Pranav M. Patel, MD<br>Arnold H. Seto, MD<br>Kevin T. Harley, MD<br>Michael A. Gibson, MD<br>Byron J. Allen, MD                                                                                 | Shirin Heydari, MS<br>Andrea M. Lundeen, MA<br>Edgar Karanjah, MD<br>Wanda C. Marfori, MD<br>Eduardo Hernandez-Rangel, MD<br>Pam Singh                                                                       | Orange, CA                                                  | University of California Irvine Medical Center (3)                                                                                              |
|                                 | Rita Coram, MD                                                                                                                                                                                                                                      | Anne Marie Webb, BSN<br>Ellie Fridell, BS<br>Heidi Wilson, BS                                                                                                                                                | Louisville, KY                                              | University of Louisville (3)                                                                                                                    |
|                                 | Sabu Thomas, MD, MSc<br>Ronald G Schwartz, MD, MS<br>Wei Chen, MD, MS                                                                                                                                                                               | Angela Kim, BS<br>Patrick Wilmot, BS                                                                                                                                                                         | Rochester, NY                                               | University of Rochester (3)                                                                                                                     |
|                                 | Mahfouz El Shahawy, MD<br>James Stafford, MD                                                                                                                                                                                                        | Ramona Stevens<br>Lorlane Black                                                                                                                                                                              | Sarasota, FL<br>Baltimore, MD                               | Cardiovascular Center of Sarasota (3)<br>University of Maryland Medical Center (3)                                                              |
|                                 | William B. Abernethy, MD                                                                                                                                                                                                                            | Amber B. Hull, RN<br>Olivia J. Lim, RN<br>Helen C. Tucker<br>Natasha C. Putnam, RN<br>Linda L. Hall<br>Tia Cauthren<br>Trish Tucker                                                                          | Asheville, NC                                               | Asheville Cardiology Associates (3)                                                                                                             |
|                                 | Andrew Zurick, MD                                                                                                                                                                                                                                   | Hollie Horton<br>Jan Orga                                                                                                                                                                                    | Nashville, TN                                               | Saint Thomas Hospital (3)                                                                                                                       |
|                                 | Thomas M. Meyer, MD<br>Ronald G. Morford, MD<br>Bruce Rutkin, MD<br>Sabahat Bokhari, MD<br>Seth I. Sokol, MD<br>Jay Meisner, MD<br>Ihab Hamzeh, MD<br>Arunima Misra, MD<br>Matthew Wall Jr., MD<br>Veronica Lenges De Rosen, MD<br>Mahboob Alam, MD | Joyce R. White, MSN NP-C<br>Cynthia Baumann, RN<br>Vidya Seeratan<br>Magnolia Jimenez<br>Cidney Schultz, RN<br>Jeanne Russo, RN                                                                              | Lynchburg, VA<br>Manhasset, NY<br>New York, NY<br>Bronx, NY | Stroobants Cardiovascular Center (3)<br>Northwell Health - Manhasset (3)<br>Columbia University Medical Center (3)<br>Jacobi Medical Center (3) |
|                                 | Michael C. Turner, MD<br>Thomas J. Mulhearn, MD                                                                                                                                                                                                     | Zohra Huda, RN, BSN, CCRP<br>Araceli Boan                                                                                                                                                                    | Houston, TX                                                 | Baylor College of Medicine (3)                                                                                                                  |
|                                 | Arnold P. Good, MD                                                                                                                                                                                                                                  | Christine R Hinton                                                                                                                                                                                           | Lake Charles, LA                                            | Cardiovascular Specialists of Southwest Louisiana (3)                                                                                           |
|                                 | Nicolas W. Shammass, MD, MS                                                                                                                                                                                                                         | Beth A. Archer, BSN, RN<br>Julia S. Dionne, BA<br>Cheryl A. Allardyce, BSN, RN<br>Lindsey N. Sikora, BSN, RN<br>Jennifer H. Czerniak, RN<br>Jennifer A. Mull, MSN, RN<br>Elizabeth Ferguson<br>Frances Laube | Columbus, OH                                                | Ohio Health Grant Medical Center (3)                                                                                                            |
|                                 | Robert Chilton, MD                                                                                                                                                                                                                                  | Gail A Shammass, BSN, RN<br>Lori Christensen<br>Holly Park                                                                                                                                                   | Davenport, IA                                               | Midwest Cardiovascular Research Foundation (3)                                                                                                  |
|                                 | Patricia K. Nguyen, MD                                                                                                                                                                                                                              | Joan Hecht                                                                                                                                                                                                   | San Antonio, TX                                             | Audie Murphy V.A. (2)                                                                                                                           |
|                                 | Matthew Jezior, MD                                                                                                                                                                                                                                  | Davis Vo, BS<br>James Hirsch                                                                                                                                                                                 | Palo Alto, CA                                               | VA Palo Alto Healthcare System (2)                                                                                                              |
|                                 | Paul C. Gordon, MD<br>Thomas Crain, MD                                                                                                                                                                                                              | Jody Bindeman<br>Sara Salkind                                                                                                                                                                                | Bethesda, MD                                                | Walter Reed National Military Medical Center (2)                                                                                                |
|                                 | Robert Stenberg, MD                                                                                                                                                                                                                                 | Dalisa Espinosa, MBS<br>Lori-Ann Desimone, BSN<br>Lina Felix-Stern<br>Jassira Gomes<br>Catherine Gordon, BSN                                                                                                 | Providence, RI                                              | Miriam Hospital (2)                                                                                                                             |
|                                 | Ronald P. Pedalino, MD                                                                                                                                                                                                                              | Aimee Mann<br>Theresa McCreary                                                                                                                                                                               | Johnstown, PA                                               | Conemaugh Valley Memorial Hospital (2)                                                                                                          |
|                                 | Joseph Wiesel, MD                                                                                                                                                                                                                                   | Stanley E. Cobos, BA<br>Raven R. Dwyer, MPH<br>Dalisa Espinosa, MBS<br>Kirsten J. Quiles, MS                                                                                                                 | Brooklyn, NY                                                | NYU-HHC Kings County Hospital Center (2)                                                                                                        |
|                                 | George J. Juang, MD                                                                                                                                                                                                                                 | Stanley E. Cobos, BA<br>Raven R. Dwyer, MPH<br>Dalisa Espinosa, MBS<br>Kirsten J. Quiles, MS                                                                                                                 | Flushing, NY                                                | New York University - Langone Cardiovascular Associates (2)                                                                                     |
|                                 | Mohammed Al-Amoodi, MD                                                                                                                                                                                                                              | Candace Gopaul, BS<br>Karen Hultberg<br>Tauqir Huk<br>Afshan Hussain                                                                                                                                         | Brooklyn, NY                                                | Coney Island Hospital (2)                                                                                                                       |
|                                 | David Wohns, MD<br>Ellis W. Lader, MD                                                                                                                                                                                                               | Yesenia Zambrano, BS<br>Sarah Medina Rodriguez<br>Trudie Milner<br>Abbey Mulder, RN<br>Stacie Van Oosterhout, MEd<br>Martha Meyer, RN, MSN                                                                   | Yuma, AZ<br>Grand Rapids, MI<br>Kingston, NY                | Yuma Regional Medical Center (2)<br>Spectrum Health (2)<br>Mid Valley Cardiology (1)                                                            |

| Country<br>(No. Randomizations)                             | Investigator(s)                                                                                                                                                                                                                                                                                                                                                                                                                                                                                                     | Study Coordinator(s)                                                                                                                                                                                                                         | City & State<br>(if applicable) | Institution (No. Randomizations)                                                |
|-------------------------------------------------------------|---------------------------------------------------------------------------------------------------------------------------------------------------------------------------------------------------------------------------------------------------------------------------------------------------------------------------------------------------------------------------------------------------------------------------------------------------------------------------------------------------------------------|----------------------------------------------------------------------------------------------------------------------------------------------------------------------------------------------------------------------------------------------|---------------------------------|---------------------------------------------------------------------------------|
|                                                             | Michael Mumma, MD                                                                                                                                                                                                                                                                                                                                                                                                                                                                                                   | Nancy L. Clapp, RN, BA, CCRC<br>Heather Barrentine                                                                                                                                                                                           | Sarasota, FL                    | Sarasota Memorial Hospital (1)                                                  |
|                                                             | Lekshmi Dharmarajan, MD                                                                                                                                                                                                                                                                                                                                                                                                                                                                                             | Jenne M. Jose, PA<br>Stanley E. Cobos, BA<br>Raven R. Dwyer, MPH<br>Dalisa Espinosa, MBS<br>Kirsten J. Quiles, MS<br>Jenne Manchery                                                                                                          | Bronx, NY                       | NYU-HHC Lincoln Medical and Mental Health Center (1)                            |
|                                                             | Joseph F.X. McGarvey Jr, MD                                                                                                                                                                                                                                                                                                                                                                                                                                                                                         | Vera McKinney, RN<br>Linda Schwarz, RN                                                                                                                                                                                                       | Doylestown, PA                  | Doylestown Health Cardiology (1)                                                |
|                                                             | Thomas R. Downes, MD (till Dec. 2016)<br>Gary J. Luckasen, MD (from Dec. 2016)                                                                                                                                                                                                                                                                                                                                                                                                                                      | Scott M. Kaczowski<br>Adam J. Jaskowiak<br>Joel Klitch                                                                                                                                                                                       | Loveland, CO                    | Medical Center of the Rockies (1)                                               |
|                                                             | Benjamin Cheong, MD                                                                                                                                                                                                                                                                                                                                                                                                                                                                                                 | Debra Dees                                                                                                                                                                                                                                   | Houston, TX                     | Baylor St. Luke's Medical Center (1)                                            |
|                                                             | Srinivasa Potluri, MD                                                                                                                                                                                                                                                                                                                                                                                                                                                                                               | Precilia Vasquez                                                                                                                                                                                                                             | Plano, TX                       | Baylor Research Institute at Legacy Heart Center (1) **                         |
|                                                             | Ronald A. Mastouri, MD<br>Jeffery A. Breall, MD, PhD<br>George E. Revtyak, MD<br>Jonathan W. Bazeley, MD                                                                                                                                                                                                                                                                                                                                                                                                            | Elise L. Hannemann, RN, CCRC<br>Judy Mae Foltz, RN, CCRC                                                                                                                                                                                     | Indianapolis, IN                | Indiana University/Krannert Institute of Cardiology (1)                         |
|                                                             | Dayuan Li, MD                                                                                                                                                                                                                                                                                                                                                                                                                                                                                                       | Emily DeRosa<br>Beth Jorgenson<br>Joyce Riestenberg-Smith                                                                                                                                                                                    | St. Paul, MN                    | HealthEast Saint Joseph's Hospital (1)                                          |
|                                                             | Kenneth Giedd, MD                                                                                                                                                                                                                                                                                                                                                                                                                                                                                                   |                                                                                                                                                                                                                                              | New York, NY                    | Beth Israel Medical Center (1)                                                  |
|                                                             | Wayne Old, MD                                                                                                                                                                                                                                                                                                                                                                                                                                                                                                       | Rebecca Bariciano                                                                                                                                                                                                                            | Chesapeake, VA                  | Cardiovascular Associates, Ltd. (1)                                             |
|                                                             | Francis Burt, MD                                                                                                                                                                                                                                                                                                                                                                                                                                                                                                    |                                                                                                                                                                                                                                              | Bethlehem, PA                   | Saint Luke's Hospital and Health Network (1)                                    |
|                                                             | Kozhaya Sokhon, MD                                                                                                                                                                                                                                                                                                                                                                                                                                                                                                  | Jessica Waldron<br>Michelle Mayon                                                                                                                                                                                                            | Sugar land, TX                  | Medicus Alliance Clinical Research Org., Inc. (1)                               |
|                                                             | Deepika Gopal, MD                                                                                                                                                                                                                                                                                                                                                                                                                                                                                                   |                                                                                                                                                                                                                                              | Plano, TX                       | The Heart Hospital Baylor (1)                                                   |
|                                                             | Uma S. Valeti, MD                                                                                                                                                                                                                                                                                                                                                                                                                                                                                                   | Gretchen Ann Peichel, RN                                                                                                                                                                                                                     | Minneapolis, MN                 | University of Minnesota (1)                                                     |
|                                                             | Jon Kobashigawa, MD                                                                                                                                                                                                                                                                                                                                                                                                                                                                                                 | Brandy Starks<br>Lucilla Garcia<br>Maria Thottam                                                                                                                                                                                             | Beverly Hills, CA               | Cedars Sinai Medical Center (1)                                                 |
| <b>India (941)</b><br>Country Leader<br>Balram Bhargava, DM | Sajeew Chakanalil Govindan, MD, DNB, DM, PhD<br>Rajesh Gopalan Nair, MD, DNB, DM                                                                                                                                                                                                                                                                                                                                                                                                                                    | Anjali Anand, MSc<br>Janitha Raj, B.Tech<br>Reshma Ravindran, MSc<br>Rajalekshmi VS, MSc, MScCRR                                                                                                                                             | Calicut                         | Government Medical College (208)                                                |
|                                                             | Cholenahally Nanjappa Manjunath, MD, DM<br>Nagaraja Moorthy, MD, DM<br>Satvica Cholenahally Manjunath, MD, DM                                                                                                                                                                                                                                                                                                                                                                                                       | Nandita Nataraj, BE(Biotech) PGDRCRDM<br>Soundarya Nayak, BE(Biotech) PGDRCRDM<br>Mahevamma Mylarappa, GNM (General Nursing)                                                                                                                 | Bengaluru                       | Sri Jayadeva Institute of Cardiovascular Sciences and Research (149)            |
|                                                             | <u>Suryaprakash Narayanappa, MBBS</u><br>Neeraj Pandit, MD, DM<br>Ranjit Kumar Nath, MD, DM                                                                                                                                                                                                                                                                                                                                                                                                                         | Sheromani Bajaj<br>Vandana Yadav, Msc, PGDAGR<br>Girish Mishra, Msc, PGDAGR                                                                                                                                                                  | New Delhi                       | Dr Ram Manohar Lohia Hospital (101)                                             |
|                                                             | S.K. Dwivedi, DM<br>V.S. Narain, DM<br>Sharad Chandra, DM                                                                                                                                                                                                                                                                                                                                                                                                                                                           | Roma Tewari, PG<br>Meenakshi Mishra, PG<br>Shivali Patel<br>Suman Singh, PG                                                                                                                                                                  | Lucknow                         | King George's Medical University, Department of Cardiology (100)                |
|                                                             | Gurpreet S. Wander, DM<br>Rohit Tandon, MD<br>Sarju Ralhan, M.Ch (CTVS)<br>Naved Aslam, DM<br>Abhishek Goyal, DM<br>Balram Bhargava, DM<br>G. Karthikeyan, DM<br>S. Ramakrishnan, DM<br>Sandeep Seth, DM<br>Rakesh Yadav, DM<br>Sandeep Singh, DM<br>Ambuj Roy, DM<br>Neeraj Parakh, DM<br>Sunil Kumar Verma, DM<br>Rajiv Narang, DM<br>Sundeep Mishra, DM<br>Nitish Naik, DM<br>Gautam Sharma, DM<br>Shiv Kumar Choudhary, M.Ch<br>Chetan Patel, DNB<br>Gurpreet Gulati, MD<br>Sanjeev Sharma, MD<br>V.K. Bahl, DM | Baljeet Kaur, MSc (Biotechnology)<br>Sonika Gupta, MBA, B. Pharmacy<br>Chandini Suvarna, BDS                                                                                                                                                 | Ludhiana                        | Hero DMC Heart Institute, Dayanand Medical College and Hospital (83)            |
|                                                             | Anoop Mathew, MD<br>Eapen Pannoose, MD<br>Milind Avdhoot Gadkari, MD<br>Siddharth Cadage, MD DNB<br>Tapan Umesh Pillay, BHMS MSc                                                                                                                                                                                                                                                                                                                                                                                    | Binoy Mannekkattukudy Kurian<br>Sheetal Rupesh Karwa, BHMS<br>Suvarna Kolhe, MSc                                                                                                                                                             | Kolenchery<br>Pune              | MOSC Medical College Hospital (39)<br>KEM Hospital Pune (35)                    |
|                                                             | Santhosh Satheesh, MBBS, MD, DM                                                                                                                                                                                                                                                                                                                                                                                                                                                                                     | R. J. Vindhya, B.Sc. (Bio-Technology), MSc(Bio-Informatics)<br>Peeyush Jain, MD<br>Ashok Seth, MD<br>Zile Singh Meharwal, MD<br>Atul Verma, MD<br>Mona Bhatia, MD<br>Ankush Sachdeva, MD<br>Thounaajam Indira Devi, RN<br>Nungshi Jungla, RN | Pondicherry                     | Jawaharlal Institute of Postgraduate Medical Education & Research (JIPMER) (31) |
|                                                             | Atul Mathur, MD<br>Upendra Kaul, MD                                                                                                                                                                                                                                                                                                                                                                                                                                                                                 | K. Manjula Rani, MSc.<br>M. Sowjanya Reddy, BSc<br>K. Preethi, BSc<br>Rinu R sidh, MSc(Clinical Research)                                                                                                                                    | New Delhi                       | Fortis Escort Heart Institute (31)                                              |
|                                                             | Johann Christopher, MD, DNB<br>Rajeev Menon, MD, DNB<br>Nirmal Kumar, MD, DNB<br>Abraham Oommen, MD, DM, DNB                                                                                                                                                                                                                                                                                                                                                                                                        | K. Manjula Rani, MSc.<br>M. Sowjanya Reddy, BSc<br>K. Preethi, BSc<br>Rinu R sidh, MSc(Clinical Research)                                                                                                                                    | Hyderabad                       | Gururanak CARE Hospital (27)                                                    |
|                                                             | Robert Mao, MD, DM<br>Hilda Solomon, PhD<br>Sudhir Naik, MD, DM<br>Sajeeda Parveen Khan, MBBS, (Dip.Card)                                                                                                                                                                                                                                                                                                                                                                                                           | Ramakrishnan T., B.Tech(Biotechnology)<br>Rajesh Francis, MSc(Clinical Research)<br>Vamshi Priya P., MSc                                                                                                                                     | Chennai                         | Apollo Research and Innovation (23)                                             |
|                                                             | Johann Christopher, MD<br>Nirmal Kumar, MD                                                                                                                                                                                                                                                                                                                                                                                                                                                                          | Kotiboinna Preethi                                                                                                                                                                                                                           | Hyderabad                       | Apollo Research & Innovations (13)<br>CARE Nampally (11)                        |
|                                                             | Purvez Grant, MD                                                                                                                                                                                                                                                                                                                                                                                                                                                                                                    | Shweta Hande, BHMS, PGDCR<br>Poonam Sonawane, B.Sc Microbiology, ACCR                                                                                                                                                                        | Pune                            | Ruby Hall Clinic, Grant Medical Foundation (10)                                 |
|                                                             | Ranjan Kachru, MD                                                                                                                                                                                                                                                                                                                                                                                                                                                                                                   | Abhishek Dubey<br>Kavita Rawat                                                                                                                                                                                                               | New Delhi                       | Fortis Healthcare Ft L1. Rajan Dhall Hospital (4)                               |
|                                                             | Ajit Kumar VK, MD, DM<br>Sanjay Ganapathi, MD, DM<br>Jayakumar K, MS, M.Ch<br>Harikrishnan Sivasadanpillai, MD, DM<br>Bijulal Sasidharan, MD, DM                                                                                                                                                                                                                                                                                                                                                                    | Vineeth CP<br>Manas Chacko, RN<br>Suresh Babu                                                                                                                                                                                                | Trivandrum                      | Sree Chitra Tirunal Institute for Medical Sciences and Technology (3)           |

| Country (No. Randomizations)    | Investigator(s)                                                                                                                                                                                                                                                                                                                                      | Study Coordinator(s)                                                                                                                                                         | City & State (if applicable) | Institution (No. Randomizations)                                                          |
|---------------------------------|------------------------------------------------------------------------------------------------------------------------------------------------------------------------------------------------------------------------------------------------------------------------------------------------------------------------------------------------------|------------------------------------------------------------------------------------------------------------------------------------------------------------------------------|------------------------------|-------------------------------------------------------------------------------------------|
|                                 | Kapilamoorthy TR, MD                                                                                                                                                                                                                                                                                                                                 |                                                                                                                                                                              |                              |                                                                                           |
|                                 | Johann Christopher, MD                                                                                                                                                                                                                                                                                                                               | Sowjanya Reddy                                                                                                                                                               | Hyderabad                    | CARE Hospital (3)                                                                         |
|                                 | Praneeth Polamuri, MD                                                                                                                                                                                                                                                                                                                                | Manjula Rani                                                                                                                                                                 |                              |                                                                                           |
|                                 | Upendra Kaul, MD                                                                                                                                                                                                                                                                                                                                     | Priyadarshani Arambam<br>Bebek Singh                                                                                                                                         | New Delhi                    | Batra Hospital and Medical Research Centre (BHMRC) (3)                                    |
| <b>United Kingdom (539)</b>     |                                                                                                                                                                                                                                                                                                                                                      |                                                                                                                                                                              |                              |                                                                                           |
| Country Leaders                 |                                                                                                                                                                                                                                                                                                                                                      |                                                                                                                                                                              |                              |                                                                                           |
| Roxy Senior, MBBS, MD, DM       |                                                                                                                                                                                                                                                                                                                                                      |                                                                                                                                                                              |                              |                                                                                           |
| Keith AA Fox, MBChB (past)      |                                                                                                                                                                                                                                                                                                                                                      |                                                                                                                                                                              |                              |                                                                                           |
| Country Coordinators            |                                                                                                                                                                                                                                                                                                                                                      |                                                                                                                                                                              |                              |                                                                                           |
| Grace M. Young, MSc, BSc (Hons) |                                                                                                                                                                                                                                                                                                                                                      |                                                                                                                                                                              |                              |                                                                                           |
| Kathryn Carruthers (past)       |                                                                                                                                                                                                                                                                                                                                                      |                                                                                                                                                                              |                              |                                                                                           |
|                                 | Roxy Senior, MBBS, MD, DM<br>Ahmed Elghamaz, MB BCh<br>Sothinathan Gurunathan, MBChB<br>Nikolaos Karogiannis, MBBS<br>Benoy N Shah, MD, MBBS, BSc (Hons)<br>Richard HJ Trimlett, MBBS, CCST<br>Michael B Rubens, LRCP, MRCS, MBBS, DMRD<br>Edward D Nicol, MD, BMedSci, MBBS, DTM&H<br>Tarun K Mittal, MD<br>Reinette Hampson, BSc (Hons), BA (Hons) | Grace M. Young, MSc, BSc (Hons)<br>Christopher Kinsey<br>Raisa Kavalakkat, MSc, BSc, RN<br>Jo Evans, RN<br>Ikraam Hassan, RN                                                 | Harrow                       | Northwick Park Hospital Harrow/ Royal Brompton Hospital London (202)                      |
|                                 | Reto Andreas Gamma, MBBS                                                                                                                                                                                                                                                                                                                             | Sarah Williams, RN<br>Kim Holland, RN<br>Karen Swan, RN                                                                                                                      | Chelmsford                   | Broomfield Hospital (39)                                                                  |
|                                 | Mark A de Belder, MD<br>Jeet Thambyrajah, MD                                                                                                                                                                                                                                                                                                         | Bev Atkinson, RN                                                                                                                                                             | Middlesbrough                | The James Cook University Hospital, Middlesbrough (37)                                    |
|                                 | Thuraia Nageh, BSc(Hons) MBBS MD MRCP<br>John R Davies, MBBS, PhD                                                                                                                                                                                                                                                                                    | Swapna Kunhunni, MRes Clin Res, BSc (N), RN                                                                                                                                  | Westcliffe on Sea            | Southend University Hospital (34)                                                         |
|                                 | Steven J. Lindsay, MD<br>John Kurian, MD<br>Haqael-Jamil, MD<br>Osama Raheem, MD<br>Angela Hoye, MD                                                                                                                                                                                                                                                  | Craig Atkinson, RN<br>Carita Krannila, RN<br>Manitha Vinod, RN                                                                                                               | Bradford                     | Bradford Royal Infirmary (20)                                                             |
|                                 | Patrick Donnelly, MD<br>Bernardas Valecka, MD                                                                                                                                                                                                                                                                                                        | Lisa Chaytor<br>Leanne Cox<br>Julie Morrow<br>Kay Rowe                                                                                                                       | Cottingham                   | The University of Hull/Castle Hill Hospital (19)                                          |
|                                 | Anoop Chauhan, MD                                                                                                                                                                                                                                                                                                                                    | Stephanie Kelly, RN<br>Susan Regan, RN<br>Dawn Turnbull                                                                                                                      | Belfast                      | South Eastern Health and Social Care (17)                                                 |
|                                 | Craig Barr, MD<br>Khaled Alfakih, MBBS, MD<br>Jonathan Byrne, PhD<br>Ian Webb, PhD, MA                                                                                                                                                                                                                                                               | Catherine Fleming<br>Arijit Ghosh<br>Karen Gratix<br>Stephen Preston<br>Anne Cartwright                                                                                      | Blackpool                    | Blackpool Teaching Hospitals (16)                                                         |
|                                 | Peter Henriksen, PhD, MB ChB, BSc(Hons)                                                                                                                                                                                                                                                                                                              | Abigail Knighton, BSc., PG Dip.<br>Katherine Martin, RGN, Dip. N, MSc                                                                                                        | Dudley                       | Russells Hall Hospital (15)                                                               |
|                                 | Peter Okane, MD                                                                                                                                                                                                                                                                                                                                      | Laura Flint, RGN<br>James Harrison, BSc(Hons), PG dip                                                                                                                        | London                       | King's College NHS Foundation Hospital (14)                                               |
|                                 | Ramesh de Silva, MB ChB, MD<br>Dwayne S. G. Conway, MD                                                                                                                                                                                                                                                                                               | Nicki Lakeman<br>Anja Ljubez                                                                                                                                                 | Edinburgh                    | Royal Infirmary of Edinburgh (13)                                                         |
|                                 | Alexander A Sirker, MB BChir, PhD                                                                                                                                                                                                                                                                                                                    | Judith Wright<br>Donna Exley                                                                                                                                                 | Bournemouth                  | Royal Bournemouth Hospital (13)                                                           |
|                                 | Stephen P Hoole, MD                                                                                                                                                                                                                                                                                                                                  | Mervyn Andiapien, RN<br>Amy J. Richards, BSc                                                                                                                                 | Bedford                      | Bedford Hospital NHS Trust (11)                                                           |
|                                 | Fraser N. Witherow, MD                                                                                                                                                                                                                                                                                                                               | Lisa Wong, MSc                                                                                                                                                               | Wakefield                    | Pinderfields Hospital (11)                                                                |
|                                 | Nicola Johnston, MB, Bch BAO, MRCP, MD<br>Mark Harbinson, MB, Bch BAO, MRCP, MD<br>Simon Walsh, MB, Bch BAO, MD<br>Hanna Douglas, MB, Bch BAO, MRCP, MD                                                                                                                                                                                              | Melanie J. Munro, RGN                                                                                                                                                        | London                       | University College London Hospitals NHS Foundation Trust<br>BartsHealth NHS Trust<br>(11) |
|                                 | Matthew Luckie, MD                                                                                                                                                                                                                                                                                                                                   | Lisa Wong, MSc                                                                                                                                                               | Cambridge                    | Papworth Hospital (10)                                                                    |
|                                 | Jolanta Sobolewska, MD                                                                                                                                                                                                                                                                                                                               | Melanie J. Munro, RGN                                                                                                                                                        | Dorchester                   | Dorset County Hospital (8)                                                                |
|                                 | Paramjit Jeetley, MD<br>Niket Patel, MD<br>Tushar Kotecha, MBChB, Mpharm                                                                                                                                                                                                                                                                             | Michelle McEvoy, RN<br>Caroline Brown, RN                                                                                                                                    | Belfast                      | Belfast Trust (7)                                                                         |
|                                 | Christopher Travill, MBBS, MD<br>Iqbal Karimullah, MBBS<br>Mahmud Al-Bustami, MBBS                                                                                                                                                                                                                                                                   | Thabitha Charles<br>Laurel Kolakaluri<br>Hannah Phillips                                                                                                                     | Manchester                   | Central Manchester University Hospital (7)                                                |
|                                 | Denise Braganza, MD                                                                                                                                                                                                                                                                                                                                  | Louise Morby, RN<br>Karen Hallett, RN<br>Carolyn Corbett, RN<br>Lynne Winstanley                                                                                             | Oldham                       | The Pennine Acute Hospitals NHS Trust (6)                                                 |
|                                 | Robert Henderson, MD<br>Kate Pointon, MBBS<br>Surendra Naik, PhD<br>Thomas Mathew, MBBS, MD, DM                                                                                                                                                                                                                                                      | Angeliqe Smit, RN                                                                                                                                                            | London                       | Royal Free London NHS Foundation Trust (6)                                                |
|                                 | Colin Berry, BSc MB ChB, PhD<br>Damien Collison, MB ChB<br>Giles Roditi, MB ChB                                                                                                                                                                                                                                                                      | Susan Gent, SRN RGN<br>Nafisa Hussain, BSc                                                                                                                                   | Luton                        | Luton and Dunstable University Hospital NHS FT (5)                                        |
|                                 | Andrew J Moriarty, BSc MB PhD<br>Jason D. Glover, MBBS<br>Jiwan Pradhan, MBBS<br>Ghada Mikhail, MD<br>Darrel P. Francis, MD, MA                                                                                                                                                                                                                      | Fiona Haines<br>Joanne Taaffe                                                                                                                                                | Peterborough                 | Peterborough City Hospital (5)                                                            |
|                                 | Gilbert Gosselin, MD                                                                                                                                                                                                                                                                                                                                 | Jane Burton<br>Maria Colton<br>Rachel King                                                                                                                                   | Peterborough                 | Peterborough City Hospital (5)                                                            |
|                                 |                                                                                                                                                                                                                                                                                                                                                      | Ammani Brown, MSc BA RN<br>Andrew Docherty, RN<br>Lisa McCloy, RN<br>Kate Robb, RN<br>Craig Paterson, PhD<br>Wenda Crawford, RN<br>Joanne Kelly, RN<br>Lorraine McGregor, RN | Nottingham                   | Nottingham University Hospitals (4)                                                       |
|                                 |                                                                                                                                                                                                                                                                                                                                                      | Anna Proietti, RN<br>Myriam Brousseau, RN<br>Magalie Corfias, RN                                                                                                             | Clydebank                    | University of Glasgow (4)                                                                 |
|                                 |                                                                                                                                                                                                                                                                                                                                                      | Anna Proietti, RN<br>Myriam Brousseau, RN<br>Magalie Corfias, RN                                                                                                             | Craigavon                    | Cardiovascular Research Unit, Craigavon Area Hospital (2)                                 |
|                                 |                                                                                                                                                                                                                                                                                                                                                      | Janet P Knight, RN                                                                                                                                                           | Basingstoke                  | Hampshire Hospitals NHS Foundation Trust (2)                                              |
|                                 |                                                                                                                                                                                                                                                                                                                                                      | Tuhina Bose                                                                                                                                                                  | London                       | Imperial College Healthcare NHS Trust (1)                                                 |
| <b>*Canada (447)</b>            |                                                                                                                                                                                                                                                                                                                                                      |                                                                                                                                                                              |                              |                                                                                           |
| Country Leaders                 |                                                                                                                                                                                                                                                                                                                                                      |                                                                                                                                                                              |                              |                                                                                           |
| Vladimir Dzavik, MD             |                                                                                                                                                                                                                                                                                                                                                      |                                                                                                                                                                              |                              |                                                                                           |
| Shaun Goodman, MD, MSc          |                                                                                                                                                                                                                                                                                                                                                      |                                                                                                                                                                              |                              |                                                                                           |
| Gilbert Gosselin, MD            |                                                                                                                                                                                                                                                                                                                                                      |                                                                                                                                                                              |                              |                                                                                           |
|                                 | Gilbert Gosselin, MD                                                                                                                                                                                                                                                                                                                                 | Anna Proietti, RN<br>Myriam Brousseau, RN<br>Magalie Corfias, RN                                                                                                             | Montreal, QC                 | Montreal Heart Institute (90)                                                             |

| Country<br>(No. Randomizations) | Investigator(s)                                                                                                                                                                                                                                                                                                                                                                                                                                                                                                         | Study Coordinator(s)                                                                                                           | City & State<br>(if applicable) | Institution (No. Randomizations)                                                                   |
|---------------------------------|-------------------------------------------------------------------------------------------------------------------------------------------------------------------------------------------------------------------------------------------------------------------------------------------------------------------------------------------------------------------------------------------------------------------------------------------------------------------------------------------------------------------------|--------------------------------------------------------------------------------------------------------------------------------|---------------------------------|----------------------------------------------------------------------------------------------------|
|                                 |                                                                                                                                                                                                                                                                                                                                                                                                                                                                                                                         | Patricia Blaise<br>Luc Harvey                                                                                                  |                                 |                                                                                                    |
|                                 | Ariel Diaz, MD<br>Philippe Rheault, MD<br>Miguel Barrero, MD<br>Carl-Éric Gagné, MD<br>Yanek Pépin-Dubois, MD<br>Ricardo Costa, MD<br>Ying Tung Sia, MD<br>Catherine Lemay, MD<br>Alejandro Gisbert, MD<br>Pierre Gervais, MD<br>Alain Rheault, MD                                                                                                                                                                                                                                                                      | Patricia Alarie<br>Linda Arcand<br>Isabelle Roy<br>Estelle Montpetit                                                           | Trois-Rivieres, QC              | Centre Hospitalier de Regional Trois-Rivieres (71)                                                 |
|                                 | Denis Carl Phaneuf, MD<br>Gilbert Gosselin, MD                                                                                                                                                                                                                                                                                                                                                                                                                                                                          | Katia Drouin, RN<br>Christine Bergeron, RN<br>Christine Shelley<br>Christine Masson                                            | Terrebonne, QC                  | CISSSL - Hopital Pierre-Le Gardeur (42)                                                            |
|                                 | Pallav Garg, MBBS, MSc                                                                                                                                                                                                                                                                                                                                                                                                                                                                                                  | Sandy Carr, RN<br>Catherine Bone, RN                                                                                           | London, ON                      | London Health Sciences Centre (35)                                                                 |
|                                 | Benjamin J.W. Chow, MD<br>Renee C. Hessian, MD<br>Rob S. Beanlands, MD<br>Richard F. Davies, MD                                                                                                                                                                                                                                                                                                                                                                                                                         | Ermina Moga<br>Janetta Kourzenkova<br>Olga Walter                                                                              | Ottawa, ON                      | University of Ottawa Heart Institute (29)                                                          |
|                                 | Kevin R. Bainey, MD, MSc                                                                                                                                                                                                                                                                                                                                                                                                                                                                                                | Norma Hogg, RN<br>Suzanne Welsh, RN                                                                                            | Edmonton, AB                    | University of Alberta (28)                                                                         |
|                                 | Asim N. Cheema, MD, PhD<br>Akshay Bagai, MD, MHS<br>Ron Wald, MDCM, MPH<br>Shaun Goodman, MD, MSc<br>John Joseph Graham, MRCP, MB ChB, BSc<br>Mark Peterson, MD, FRCSC, PhD<br>Chi-Ming Chow, MD, CM, MSc<br>Beth Abramson, MD, MSc<br>Asim Nazir Cheema, MD<br>Mohammad Tariq Vakani, MD                                                                                                                                                                                                                               | Khrystyna Kushniriuk, HBSc, MD<br>Mohammed Hussain<br>Olugbenga Bello                                                          | Toronto, ON                     | St. Michael's Hospital (27)                                                                        |
|                                 | James Cha, MD                                                                                                                                                                                                                                                                                                                                                                                                                                                                                                           | Ishba Syed, MBBS<br>Mohammed Hussain, BSc(H)<br>Khrystyna Kushniriuk, MBBS                                                     | Mississauga, ON                 | Dixie Medical Group (24)                                                                           |
|                                 | Andrew G Howarth, MD, PhD                                                                                                                                                                                                                                                                                                                                                                                                                                                                                               | Judy Otis, CRC<br>Rebecca Otis, CRC                                                                                            | Oshawa, ON                      | Dr. James Cha (21)                                                                                 |
|                                 | Graham Wong, MD                                                                                                                                                                                                                                                                                                                                                                                                                                                                                                         | Michelle M Seib, RN<br>Sandra M Rivest, RN<br>Rosa Sandonato, BSCN                                                             | Calgary, AB                     | University of Calgary (15)                                                                         |
|                                 | Amar Uxa, MD                                                                                                                                                                                                                                                                                                                                                                                                                                                                                                            | Jackie Chow<br>Andrew Starovoytov<br>Naomi Uchida<br>Ngairé Meadows                                                            | Vancouver, BC                   | Vancouver General Hospital (15)                                                                    |
|                                 | Paul Galiwango, MD<br>Saleem Kassam, MD<br>Ashok Mukherjee, MD<br>A. Joseph Ricci, MD                                                                                                                                                                                                                                                                                                                                                                                                                                   | Nadia Asif<br>Suzana Tavares                                                                                                   | Toronto, ON                     | University Health Network (14)                                                                     |
|                                 | Andy Lam, MD                                                                                                                                                                                                                                                                                                                                                                                                                                                                                                            | Bev Bozek, RN, CCRC<br>Maria Shier<br>Lori-Ann Larmand<br>Amir Janmohamed<br>Brenda Hart                                       | Scarborough, ON                 | Scarborough Cardiology Research (9)                                                                |
|                                 | Shamir Mehta, MD                                                                                                                                                                                                                                                                                                                                                                                                                                                                                                        | Jane Marucci<br>Sharon Tai                                                                                                     | East Grimsby, ON                | West Lincoln Memorial Hospital (8)                                                                 |
|                                 | Jacob Udell, MD                                                                                                                                                                                                                                                                                                                                                                                                                                                                                                         | Sonya Brons, RN<br>Chris Beck, RN<br>Glenda Wong, RN<br>Krystal Etherington<br>Thippeekaa Arumairajah                          | Hamilton, ON                    | Hamilton General Hospital (7)                                                                      |
|                                 | Philippe Gagné, MD                                                                                                                                                                                                                                                                                                                                                                                                                                                                                                      | Maria Aprile<br>Sara Karlsson<br>Susan Webber                                                                                  | Toronto, ON                     | Women's College Hospital (7)                                                                       |
|                                 | Adnan Hameed, MD                                                                                                                                                                                                                                                                                                                                                                                                                                                                                                        | Chantale Mercure                                                                                                               | Montréal, QC                    | Centre Intégré Universitaire de Santé et de Services Sociaux du Montréal (2)                       |
|                                 | Ledjalem Daba, MD                                                                                                                                                                                                                                                                                                                                                                                                                                                                                                       | Nancy Aedy                                                                                                                     | St. Catharines, ON              | Saint Catharines General Hospital (2)                                                              |
|                                 |                                                                                                                                                                                                                                                                                                                                                                                                                                                                                                                         | Fran Farquharson<br>Anam Siddiqui                                                                                              | Vaughan, ON                     | Northwest GTA Cardiovascular and Heart Rhythm Program (1)                                          |
| <b>Brazil (399)</b>             |                                                                                                                                                                                                                                                                                                                                                                                                                                                                                                                         |                                                                                                                                |                                 |                                                                                                    |
| Country Leaders                 | Antonio Carlos Carvalho, MD, PhD<br>Renato D. Lopes, MD, PhD                                                                                                                                                                                                                                                                                                                                                                                                                                                            |                                                                                                                                |                                 |                                                                                                    |
|                                 | Whady Hueb, MD<br>Paulo Cury Rezende, MD<br>Expedito Eustáquio Ribeiro Silva, MD<br>Alexandre Ciappina Hueb, MD<br>Paola Emanuela Poggio Smanio, MD, PhD<br>Alexandre Schaan de Quadros, MD<br>Renato Abdala Karam Kalil, MD<br>José Luiz da Costa Vieira, MD<br>Gabriel Grossmann, MD<br>Pedro Piccaro de Oliveira, MD<br>Leonardo Bridi, MD<br>Simone Savaris, MD<br>João V Vitola, MD, PhD<br>Rodrigo J Cerci, MD, Msc<br>Fabio R Farias, MD, Msc<br>Miguel M Fernandes, MD, PhD<br>José Antonio Marin-Neto, MD, PhD | Myrthes Emy Takiuti, RN                                                                                                        | Sao Paulo                       | Heart Institute (InCor) University of São Paulo (127)                                              |
|                                 | André Schmidt, MD, PhD<br>Moisés de Oliveira Lima Filho, MD, PhD<br>Ricardo Mendes Oliveira, MD<br>João Reynaldo Abbud Chierice, MD                                                                                                                                                                                                                                                                                                                                                                                     | Leonardo Pizzol Caetano, PhD                                                                                                   | São Paulo                       | Instituto Dante Pazzanese de Cardiologia (98)                                                      |
|                                 | Carísi A. Polanczyk, MD<br>Mariana V. Furtado, MD<br>Luis F. Smidt, MD<br>Antonio Carlos Carvalho, MD<br>Gustavo Pucci, MD<br>Flavio Lyra, MD<br>Alvaro Rabelo Alves Junior, MD                                                                                                                                                                                                                                                                                                                                         | Aline Peikoto Deiro<br>Alice Manica Muller<br>Maria Antonieta Pereira de Moraes<br>Bruna Maria Ascoli<br>Silvia Zottis Poletti | Porto Alegre                    | Instituto de Cardiologia de Porto Alegre (41)                                                      |
|                                 | Marianna D. A. Dracoulakis, MD, PhD<br>Rodolfo G. S. D Lima, MD<br>Estevo Figueiredo, MD                                                                                                                                                                                                                                                                                                                                                                                                                                | Sandra S. Zier, BSc<br>Vilmar Veiga Jr, BSc                                                                                    | Curitiba                        | Quanta Diagnostico & Terapia (33)                                                                  |
|                                 | Paulo Ricardo Caramori, MD                                                                                                                                                                                                                                                                                                                                                                                                                                                                                              | Diego Franca da Cunha                                                                                                          | Ribeirão Preto                  | Hospital das Clinicas da Faculdade de Medicina de Ribeirão Preto da Universidade de São Paulo (31) |
|                                 |                                                                                                                                                                                                                                                                                                                                                                                                                                                                                                                         | Guilherme G Rucatti, PsyD<br>Fernanda Igansi, BSc<br>Mauren P Haeffner, BSc                                                    | Porto Alegre                    | Hospital de Clinicas de Porto Alegre (12)                                                          |
|                                 |                                                                                                                                                                                                                                                                                                                                                                                                                                                                                                                         | Viviane Almeida<br>Gabriela Sanchez de Souza                                                                                   | Sao Paulo                       | Unifesp - Hospital Sao Paulo (9)                                                                   |
|                                 |                                                                                                                                                                                                                                                                                                                                                                                                                                                                                                                         | Mayana Almeida<br>Viviane dos Santos                                                                                           | Salvador                        | Fundacao Bahiana de Cardiologia (9)                                                                |
|                                 |                                                                                                                                                                                                                                                                                                                                                                                                                                                                                                                         | Natalia S Oliveira, RN                                                                                                         | Salvador                        | Hospital da Bahia (8)                                                                              |
|                                 |                                                                                                                                                                                                                                                                                                                                                                                                                                                                                                                         | Bruna Edilena Paulino Azevedo<br>Marco Bizzaro Santos                                                                          | Belo Horizonte                  | Hospital Lifecenter (8)                                                                            |
|                                 |                                                                                                                                                                                                                                                                                                                                                                                                                                                                                                                         | Amanda Germann<br>Vitor Gomes<br>Rosa Homem<br>Ellen Magedanz                                                                  | Porto Alegre                    | Hospital Sao Lucas da Pontificia Universidade Catolica do Rio Grande do Sol (7)                    |

| Country (No. Randomizations)                                                                                                            | Investigator(s)                                                                                                                                                                                                                                                                                                                                                                                                                                                                                                                                                                                                                             | Study Coordinator(s)                                                                                                                                                             | City & State (if applicable)              | Institution (No. Randomizations)                                                                                                                                                                                           |
|-----------------------------------------------------------------------------------------------------------------------------------------|---------------------------------------------------------------------------------------------------------------------------------------------------------------------------------------------------------------------------------------------------------------------------------------------------------------------------------------------------------------------------------------------------------------------------------------------------------------------------------------------------------------------------------------------------------------------------------------------------------------------------------------------|----------------------------------------------------------------------------------------------------------------------------------------------------------------------------------|-------------------------------------------|----------------------------------------------------------------------------------------------------------------------------------------------------------------------------------------------------------------------------|
|                                                                                                                                         | Rogério Tumelero, MD                                                                                                                                                                                                                                                                                                                                                                                                                                                                                                                                                                                                                        | Rosane Laimer<br>Alexandre Tognon                                                                                                                                                | Fundo                                     | Hospital Sao Vicente de Paulo (5)                                                                                                                                                                                          |
|                                                                                                                                         | Frederico Dall'Orto, MD<br>Claudio T. Mesquita, MD<br>Alexandre S. Colafranceschi, MD                                                                                                                                                                                                                                                                                                                                                                                                                                                                                                                                                       |                                                                                                                                                                                  | Pocos de Caldas                           | Hospital Maternidade e Pronto Socorro Santa Lucia (4)                                                                                                                                                                      |
|                                                                                                                                         | Amarino C. Oliveira Jr., MD<br>Luiz A. Carvalho, MD<br>Isabella C. Palazzo, MD<br>Andre S. Sousa, MD                                                                                                                                                                                                                                                                                                                                                                                                                                                                                                                                        | Roberta P Santos, RN                                                                                                                                                             | Botafogo                                  | Hospital Pró-Cardiaco (3)                                                                                                                                                                                                  |
|                                                                                                                                         | Expedito Eustáquio Ribeiro da Silva, MD, PhD<br>Pedro Gabriel Melo de Barros e Silva, MD, PhD<br>Luciana de Pádua Silva Baptista, MD, PhD<br>Marcelo Jamus Rodrigues, MD<br>Marcos Valério Coimbra de Resende, MD, PhD                                                                                                                                                                                                                                                                                                                                                                                                                      | Mariana Yumi Okada, RN<br>Ana Paula Batista, RN<br>Aline Nogueira Rabaça, BS                                                                                                     | Sao Paulo                                 | Hospital TotalCor (2)                                                                                                                                                                                                      |
|                                                                                                                                         | Jose Francisco Saraiva, MD                                                                                                                                                                                                                                                                                                                                                                                                                                                                                                                                                                                                                  | Larissa Miranda Trama<br>Talita Silva<br>Camila Thais de Souza Ormundo<br>Carla Vicente                                                                                          | Sao Paulo                                 | Hospital Celso Pierro (1)                                                                                                                                                                                                  |
|                                                                                                                                         | Costantino Costantini, MD, PhD                                                                                                                                                                                                                                                                                                                                                                                                                                                                                                                                                                                                              | Caroline Pinheiro<br>Daniele Komar                                                                                                                                               | Curitiba                                  | Hospital Cardiologico Costantini (1)                                                                                                                                                                                       |
| <b>Poland (333)</b><br>Country Leaders<br>Witold Ruzyllo, MD<br>Hanna Szwed, MD, PhD<br>Country Coordinator<br>Radoslaw Pracon, MD, PhD | Marcin Demkow, MD, PhD<br>Radoslaw Pracon, MD, PhD<br>Cezary Kepka, MD PhD<br>Anna Teresinska, MD PhD<br>Karolina Kryczka, MD PhD<br>Jan Henzel, MD PhD<br>Mateusz Solecki, MD PhD<br>Edyta Kaczmarek, MD PhD                                                                                                                                                                                                                                                                                                                                                                                                                               | Olga Walesiak<br>Katarzyna Malinowska                                                                                                                                            | Warsaw                                    | Coronary and Structural Heart Diseases Department, Institute of Cardiology (127)                                                                                                                                           |
|                                                                                                                                         | Tomasz Mazurek, MD, PhD                                                                                                                                                                                                                                                                                                                                                                                                                                                                                                                                                                                                                     | Jakub Maksym, MD<br>Karolina Wojtera, MD<br>Anna Fojt, MD<br>Ewa Szerba, MD                                                                                                      | Warszawa                                  | Medical University of Warsaw (48)                                                                                                                                                                                          |
|                                                                                                                                         | Jaroslawn Drozd, PhD<br>Bartosz Czarniak, MD<br>Malgorzata Frach (formerly Stasiak), MD<br>Konrad Szymczyk, MD<br>Iwona Niedzwiecka, MD<br>Sebastian Sobczak, MD<br>Tomasz Cirus, MD<br>Piotr Jakubowski, MD<br>Magdalena Misztal-Teodorczyk, MD<br>Dawid Teodorczyk, MD<br>Aleksandra Fraczak, MD<br>Marcin Szkopiak, MD<br>Patrycja Lebiada, MD<br>Michal Wlodarczyk, MD<br>Anna Plachcinska, MD<br>Jacek Kusmerek, MD<br>Magdalena Miller, MD<br>Halina Marciniak, MD<br>Karolina Wojtczak-Soska, MD<br>Katarzyna Luszczak, MD<br>Tomasz Tarchalski, MD<br>Anna Cichocka-Radwan, MD<br>Hanna Szwed, MD, PhD<br>Grazyna Anna Szulczyk, MD | Marta Swiderek, MA<br>Ewelina Wojtala, MA                                                                                                                                        | Lodz                                      | Cardiology Clinic, Medical University in Lodz (43)                                                                                                                                                                         |
|                                                                                                                                         | Adam Witkowski, MD, PhD<br>Krzysztof Kukuła, MD, PhD<br>Malgorzata Celińska-Spodar, MD<br>Joanna Zalewska, MD                                                                                                                                                                                                                                                                                                                                                                                                                                                                                                                               | Jaroslawn Karwowski, MD                                                                                                                                                          | Warsaw                                    | Institute of Cardiology, Warsaw (35)                                                                                                                                                                                       |
|                                                                                                                                         | Grzegorz Gajos, MD, PhD<br>Krzysztof Bury, MD, PhD                                                                                                                                                                                                                                                                                                                                                                                                                                                                                                                                                                                          |                                                                                                                                                                                  | Krakow                                    | Department of Coronary Disease, John Paul II Hospital, Jagiellonian University Medical College (16)                                                                                                                        |
|                                                                                                                                         | Piotr Pruszczyk, MD, PhD<br>Marek Roik, MD, PhD                                                                                                                                                                                                                                                                                                                                                                                                                                                                                                                                                                                             | Andrzej Labyk, MD<br>Agnieszka Szramowska, MD<br>Olga Zdończyk, MD                                                                                                               | Warszawa                                  | Department of Internal Medicine and Cardiology, Infant Jesus Teaching Hospital, Medical University of Warsaw (15)                                                                                                          |
|                                                                                                                                         | Krystyna Loboż-Grudzień, MD, PhD<br>Leszek Sokalski, MD, PhD<br>Barbara Brzezińska, MD, PhD<br>Maciej Lesiak, Professor, MD<br>Magdalena Lanocha, MD                                                                                                                                                                                                                                                                                                                                                                                                                                                                                        | Joanna Jaroż, MD, PhD                                                                                                                                                            | Wroclaw                                   | T.Marciniak Hospital (11)                                                                                                                                                                                                  |
|                                                                                                                                         | Krzysztof W. Reczuch, MD<br>Zbigniew Kalarus, MD<br>Andrzej Swiatkowski, MD<br>Mariola Szulik, MD                                                                                                                                                                                                                                                                                                                                                                                                                                                                                                                                           | Adam Kolodziej, MD                                                                                                                                                               | Wroclaw                                   | Military Hospital / Medical University (4)                                                                                                                                                                                 |
|                                                                                                                                         | Włodzimirz J. Musiał, MD                                                                                                                                                                                                                                                                                                                                                                                                                                                                                                                                                                                                                    | Marta Marcinkiewicz-Siemion, MD                                                                                                                                                  | Bialystok                                 | University Hospital in Bialystok (1)                                                                                                                                                                                       |
| <b>Russia (303)</b><br>Country Coordinator<br>Olga Bockeria, MD, PhD                                                                    | Leo Bockeria, MD, PhD<br>Karen Petrosyan, MD, PhD<br>Tatiana Trifonova, MD<br>Alexander M. Chernyavskiy, MD, PhD<br>Evgeniy I. Kretov, MD<br>Igor O. Grazhdankin, MD<br>Leonid L. Bershtein, MD, PhD<br>Sergey A. Sayganov, MD, PhD<br>Anastasia M. Kuzmina-Krutetskaya, MD<br>Elizaveta V. Zbyshevskaya, MD, PhD<br>Nana O. Katamadze, MD, PhD<br>Elena A. Demchenko, MD, PhD<br>Pavel S. Kozlov, MD<br>Vikentiy Y. Kozulin, MD<br>Ekaterina I. Lubinskaya, MD                                                                                                                                                                             | Olga Bockeria, MD, PhD<br>Zalina Kudzoeva, MD<br>Nodira Aripova, MD<br>Ivan A. Naryshkin, MD<br>Alena Kuleshova, MD<br>Dastan Malaev, MD<br>Irina Subbotina<br>Victoria Gumerova | Moscow<br>Novosibirsk<br>Saint Petersburg | National Medical Research Center for Cardiovascular Surgery (113)<br>E.Meshalkin National Medical Research Center of the Ministry of Health of the Russian Federation (101)<br>North-Western State Medical University (50) |
|                                                                                                                                         |                                                                                                                                                                                                                                                                                                                                                                                                                                                                                                                                                                                                                                             | Olga B. Nikolaeva, MD                                                                                                                                                            | Saint Petersburg                          | Federal Almazov North-West Medical Research Centre (39)                                                                                                                                                                    |
| <b>*Spain (286)</b><br>Country Leader<br>Jose Luis Lopez-Sendon, MD, PhD<br>Country Coordinator<br>Almudena Castro, MD                  | Jose Lopez-Sendon, MD, PhD<br>Almudena Castro, MD<br>Elena Refoyo Salicio, MD                                                                                                                                                                                                                                                                                                                                                                                                                                                                                                                                                               | Virginia Fernández-Figares, Pharm                                                                                                                                                | Madrid                                    | Hospital La Paz. IdiPaz (118)                                                                                                                                                                                              |

| Country<br>(No. Randomizations)                              | Investigator(s)                                                                                                                                                                                                                                                  | Study Coordinator(s)                                                                                          | City & State<br>(if applicable) | Institution (No. Randomizations)                                                                                                                       |
|--------------------------------------------------------------|------------------------------------------------------------------------------------------------------------------------------------------------------------------------------------------------------------------------------------------------------------------|---------------------------------------------------------------------------------------------------------------|---------------------------------|--------------------------------------------------------------------------------------------------------------------------------------------------------|
|                                                              | Gabriela Guzman, MD<br>Gabriel Galeote, MD<br>Silvia Valbuena, MD                                                                                                                                                                                                |                                                                                                               |                                 |                                                                                                                                                        |
|                                                              | Jesús Peteiro, MD, PhD<br>María Dolores Martínez-Ruiz, MD<br>Ruth Pérez-Fernández, MD<br>José J Cuenca-Castillo, MD<br>Xacobe Flores-Ríos, MD<br>Óscar Prada-Delgado, MD<br>Gonzalo Barge-Caballero, MD                                                          | Moisés Blanco-Calvo, PhD<br>Encarnación Alonso-Álvarez, BSc<br>Paula García-González, BSc                     | A Coruna                        | Complejo Hospitalario Universitario A Coruña (CHUAC) Sergas, Department of Cardiology. INIBIC A Coruña. CIBER-CV. Universidad de A Coruña, Spain (112) |
|                                                              | Jose Ramon Gonzalez Juanatey, MD, PhD<br>Miguel Souto Bayarri, MD, PhD<br>Virginia Pubull Nuñez, MD<br>Raymundo Ocaranza Sanchez, MD, PhD<br>Belen Cid Alvarez, MD<br>Carlos Peña Gil, MD, PhD<br>Amparo Martinez Monzonis, MD                                   | Jose Seijas Amigo, Pharm                                                                                      | Santiago de Compostela          | Hospital Clinico Universitario de Santiago (17)                                                                                                        |
|                                                              | Alessandro Sionis, MD<br>Montserrat Vila Perales, MD<br>Josep Maria Padró, MD<br>Antonio Serra Peñaranda, MD<br>Joan Garcia Picart, MD<br>Antonino Ginel Iglesias, MD<br>Xavier Garcia-Moll Marimon, MD<br>Guillem Pons Lladó, MD<br>Francesc Carreras Costa, MD | Ana Fernández Martínez, RN                                                                                    | Barcelona                       | Hospital de la Santa Creu i Sant Pau (11)                                                                                                              |
|                                                              | Vicente Miro, MD<br>Jose L Díez, MD<br>Pilar Calvillo, MD                                                                                                                                                                                                        | Begoña Igual, MD                                                                                              | Valencia                        | Hospital Universitario y Politecnico La Fe (10)                                                                                                        |
|                                                              | F. Marin Ortúño, MD, PhD<br>M. Valdés Chávarri, MD, PhD<br>A. Tello Montoliu, MD, PhD<br>E. Pinar Bermudez, MD, PhD<br>G. De La Morena, MD, PhD                                                                                                                  | M. Quintana Giner, MD<br>A.I. Romero Anioarte, MD<br>J.M. Rivera Caravaca, MD                                 | Murcia                          | HUVA, Hospital Clínico Universitario Virgen De La Arrixaca (8)                                                                                         |
|                                                              | Montserrat Gracida Blancas, MD                                                                                                                                                                                                                                   | Olga Cañavate<br>Sonia Guerrero<br>Silvia Riera                                                               | Barcelona                       | Hospital De Bellvitge (4)                                                                                                                              |
|                                                              | Jose Enrique Castillo Luena, MD                                                                                                                                                                                                                                  | Jose Enrique Castillo Luena<br>Maria Lasala                                                                   | Zaragoza                        | Hospital Universitario Miguel Servet (4)                                                                                                               |
|                                                              | Francisco Fernandez-Aviles, MD                                                                                                                                                                                                                                   | Maria Lorenzo<br>Olga Sobrino<br>Alexandra Vazquez                                                            | Madrid                          | Hospital General Universitario Gregorio Marañon (2)                                                                                                    |
| <b>China (246)</b><br>Country Leader<br>Lixin Jiang, MD, PhD |                                                                                                                                                                                                                                                                  | Haojian Dong<br>Peiyu He<br>Chunli Xia<br>Junqing Yang<br>Qi Zhong                                            | Guangzhou                       | Guangdong General Hospital (102)                                                                                                                       |
|                                                              | Yongjian Wu, MD, PhD                                                                                                                                                                                                                                             | Yanmeng Tian, MD                                                                                              | Beijing                         | Chinese Academy of Medical Sciences, Fuwai Hospital (17)                                                                                               |
|                                                              | Yitong Ma, MD<br>Yining Yang, MD                                                                                                                                                                                                                                 | Dongze Li<br>Xiaomei Li<br>Xiang Ma<br>Zixiang Yu<br>Qian Zhao<br>Chunguang Li                                | Urumqi                          | First Affiliated Hospital of Xinjiang Medical University (15)                                                                                          |
|                                                              | Zheng Ji, MD                                                                                                                                                                                                                                                     | Lei Zhang<br>Yu Zhao<br>Bolin Zhu                                                                             | Tangshan                        | Tangshan Gongren Hospital (15)                                                                                                                         |
|                                                              | Xinchun Yang, MD                                                                                                                                                                                                                                                 | Mulei Chen<br>Hongjie Chi<br>Yang Wang<br>Jing Zhang                                                          | Beijing                         | Beijing Chao-yang Hospital, Capital Medical University (12)                                                                                            |
|                                                              | Wenhua Lin, MD                                                                                                                                                                                                                                                   | Rui Jing<br>Jingjing Liu                                                                                      | Tianjing                        | TEDA International Cardiovascular Hospital (12)                                                                                                        |
|                                                              | Hesong Zeng, MD                                                                                                                                                                                                                                                  | Qiang Zhou, MD<br>Chang Xu, MD<br>Zhuxi Li, MD<br>Junhua Li, MD<br>Luyang Xiong, MD                           | Wuhan                           | Tongji Medical College (11)                                                                                                                            |
|                                                              | Xin Fu, MD                                                                                                                                                                                                                                                       | Dan Gao<br>Dengke Jiang<br>Ran Leng<br>Xutong Wang<br>Qianqian Yuan<br>Lili Zhang                             | Zhengzhou                       | The First Affiliated Hospital of Zhengzhou University (11)                                                                                             |
|                                                              | Bin Yang, MD                                                                                                                                                                                                                                                     | Ziliang Bai<br>Jianhua Li<br>Jie Qi<br>Fei Wang<br>Haitao Wang<br>Bin Yang<br>Zhou Yue<br>Zhulin Zhang        | Taiyuan                         | Shanxi Cardiovascular Hospital (10)                                                                                                                    |
|                                                              | Songtao Wang, MD                                                                                                                                                                                                                                                 | Yumei Dong<br>Jiajia Mao<br>Bin Zhang                                                                         | Qingdao                         | Qingdao Fuwai Hospital (8)                                                                                                                             |
|                                                              | Gong Cheng, MD                                                                                                                                                                                                                                                   | Xiaohong Li<br>Xiaowei Yao<br>Nier Zhong<br>Ning Zhou                                                         | Xian                            | Shanxi Provincial People's Hospital (6)                                                                                                                |
|                                                              | Yulan Zhao, MD                                                                                                                                                                                                                                                   | Yaping Huang, MS<br>Panpan Zhou, MS                                                                           | Zhengzhou                       | The Second Affiliated Hospital of Zhengzhou University (6)                                                                                             |
|                                                              | Xuehua Fang, MD                                                                                                                                                                                                                                                  | Wei Su                                                                                                        | Beijing                         | Liangxiang Hospital, Beijing Fangshan District (6)                                                                                                     |
|                                                              | Qitang Zeng, MD                                                                                                                                                                                                                                                  | Yu Kunwu<br>Yudong Peng<br>Xin Su                                                                             | Wuhan                           | Wuhan Union Hospital, Tongji Medical College, Huazhong Science and Tech University (3)                                                                 |
|                                                              | Xi Su, MD                                                                                                                                                                                                                                                        | Chen Wang<br>Yunhai Zhao                                                                                      | Wuhan                           | Wuhan Asia Heart Hospital (3)                                                                                                                          |
|                                                              | Qingxian Li, MD                                                                                                                                                                                                                                                  | Yaming Geng<br>Yanfu Wang                                                                                     | Jining                          | Affiliated Hospital of Jining Medical University (3)                                                                                                   |
|                                                              | Shao-ping Nie, MD, PhD                                                                                                                                                                                                                                           | Jing-yao Fan, MD<br>Si-ting Feng, MD, PhD<br>Xiao Wang, MD, PhD<br>Yan Yan, MD, PhD<br>Hui-min Zhang, MD, PhD | Beijing                         | Beijing Anzhen Hospital (2)                                                                                                                            |
|                                                              | Qin Yu, MD                                                                                                                                                                                                                                                       | Lingping Chi<br>Fang Liu                                                                                      | Dalian                          | Affiliated Zhongshan Hospital of Dalian University (2)                                                                                                 |



| Country<br>(No. Randomizations)                                                                                   | Investigator(s)                                                                                                                                                                                                                                                                                                                                                            | Study Coordinator(s)                                                                                                                                                                  | City & State<br>(if applicable)                        | Institution (No. Randomizations)                                                                                                                                                                                            |
|-------------------------------------------------------------------------------------------------------------------|----------------------------------------------------------------------------------------------------------------------------------------------------------------------------------------------------------------------------------------------------------------------------------------------------------------------------------------------------------------------------|---------------------------------------------------------------------------------------------------------------------------------------------------------------------------------------|--------------------------------------------------------|-----------------------------------------------------------------------------------------------------------------------------------------------------------------------------------------------------------------------------|
|                                                                                                                   | Jian'an Wang, MD                                                                                                                                                                                                                                                                                                                                                           | Han Chen<br>Jun Jiang<br>Huajun Li<br>Jian'an Wang                                                                                                                                    | Hangzhou                                               | The Second Affiliated Hospital Zhejiang University School of Medicine (1)                                                                                                                                                   |
|                                                                                                                   | Shuyang Zhang, MD, PhD<br>Zhenyu Liu, MD                                                                                                                                                                                                                                                                                                                                   | Yechen Han, MM<br>Lihong Xu, RN<br>Zhenyu Liu<br>Gang Chen<br>Rongrong Hu                                                                                                             | Beijing                                                | Peking Union Medical College Hospital (1)                                                                                                                                                                                   |
| <b>*Italy (139)</b><br>Country Leader<br>Aldo P. Maggioni, MD                                                     | Gian Piero Perna, MD<br>Marco Marini, MD<br>Gabriele Gabrielli, MD<br>Stefano Provasoli, MD<br>Edoardo Verna, MD<br>Lorenzo Monti, MD<br>Barbara Nardi, MD<br>Antonio Di Chiara, MD                                                                                                                                                                                        | Francesca Pietrucci, PhD<br>Anna Di Donato<br>Francesca Pezzetta, MD                                                                                                                  | Ancona<br>Varese<br>Rozzano<br>Tolmezzo                | Cardiology and CCU - Ospedali Riuniti Ancona (54)<br>Ospedale di Circolo e Fondazione Macchi (23)<br>Humanitas Research Hospital, Rozzano (MI) (17)<br>Azienda Servizi Sanitaria n.3 Alto Friuli-Collinare-Medio Friuli (9) |
|                                                                                                                   | Andrea Mortara, MD<br>Marcello Galvani, MD<br>Filippo Ottani, MD                                                                                                                                                                                                                                                                                                           | Valentina Casali, MD<br>Chiara Attanasio                                                                                                                                              | Monza<br>Forli                                         | Policlinico di Monza, Monza MB (8)<br>Ospedale "G.B. Morgagni - L. Pierantoni" Forli (AUSL della Romagna) (8)                                                                                                               |
|                                                                                                                   | Marco Sicuro, MD                                                                                                                                                                                                                                                                                                                                                           | Gianpiero Leone, MD<br>Francesco Pisano, MD<br>Cristina Bare, BSc                                                                                                                     | Aosta                                                  | Ospedale Regionale Umberto Parini (5)                                                                                                                                                                                       |
|                                                                                                                   | Paolo Calabro, MD<br>Tiziana Formisano, MD                                                                                                                                                                                                                                                                                                                                 | Fabio Fimiani                                                                                                                                                                         | Napoli                                                 | AORN Dei Colli "V. Monaldi" UOC Cardiologia Università della Campania "L. Vanvitelli" (4)                                                                                                                                   |
|                                                                                                                   | Giuseppe Tarantini, MD<br>Umberto Cucchini, MD<br>Anto Luigi Andres, MD                                                                                                                                                                                                                                                                                                    | Alberto Barioli, MD<br>Federica Ramani                                                                                                                                                | Padua                                                  | University of Padua- Cardiology Clinic (3)                                                                                                                                                                                  |
|                                                                                                                   | Emanuela Racca, MD                                                                                                                                                                                                                                                                                                                                                         | Fabrizio Rolfo, MD<br>Cecilia Goletto                                                                                                                                                 | Cuneo                                                  | Azienda Ospedaliera S. Croce e Carle (3)                                                                                                                                                                                    |
|                                                                                                                   | Carlo Briguori, MD<br>Roberto Amati, MD<br>William Vergoni, MD<br>Aldo Russo, MD<br>Raffaele Fanelli, MD                                                                                                                                                                                                                                                                   | Francesca De Micco<br>Stefano Di Marco, MD<br>Martina Tricoli<br>Massimo Vilella, MD                                                                                                  | Naples<br>Pescia<br>San Giovanni Rotondo               | Clinica Mediterranea (2)<br>UO Cardiologia Ospedale SS Cosma e Damiano (2)<br>IRCCS "Casa Sollievo della Sofferenza" (1)                                                                                                    |
| <b>*Singapore (61)</b><br>Country Leader<br>Harvey Douglas White, MD<br>Country Coordinator<br>Caroline Alswailer | Kian-Keong Poh, MD<br>Ping Chai, MD<br>Titus Lau, MD<br>Joshua P. Loh, MD<br>Edgar L. Tay, MD<br>Kristine Teoh, MD<br>Lynette L. Teo, MD<br>Ching-Ching Ong, MD<br>Raymond C. Wong, MD<br>Poay-Huan Loh, MD<br>Theodoros Kofidis, MD<br>Wan Xian Chan, MD<br>Koo Hui Chan, MD<br>David Foo, MBBS<br>Jason Loh Kwok Kong, MD<br>Ching Min Er, MD<br>Fahim Haider Jafary, MD | Sik-Yin V Tan, BSc<br>Winnie C Sia, BSc<br>Audrey W Leong, BSc<br>Li Hai Yan, RN<br>Nasrul Ismail<br>Min Tun Kyaw<br>Deborah Yip                                                      | Singapore<br>Singapore<br>Singapore                    | National University Heart Center Singapore (33)<br>Tan Tock Seng Hospital (22)<br>National Heart Centre Singapore (6)                                                                                                       |
| <b>Germany (54)</b><br>Country Leader<br>Rolf Doerr, MD                                                           | Rolf Doerr, MD<br>Juergen Stumpf, MD<br>Klaus Matschke, MD, PhD<br>Gregor Simonis, MD, PhD<br>Clemens T. Kadalie, MD<br>Udo Sechtem, MD<br>Peter Ong, MD<br>P. Christian Schulze, MD, PhD<br>Bjoern Goebel, MD<br>Karsten Lenk, MD                                                                                                                                         | Dorit Grahl<br>Franziska Guenther<br>Kerstin Bonin<br>Ina Wenzelburger<br>Susanne Gruensfelder, RN<br>Jan-Malte Sinning, MD<br>Marcel Weber, MD<br>Nikos Werner, MD                   | Dresden<br>Stuttgart<br>Jena<br>Bonn                   | Praxisklinik Herz und Gefaesse (29)<br>Robert-Bosch-Krankenhaus (22)<br>University Hospital Jena (2)<br>Universitätsklinikum Bonn (1)                                                                                       |
| <b>Austria (50)</b><br>Country Leaders<br>Irene Marthe Lang, MD<br>Kurt Huber, MD                                 | Herwig Schuchlenz, MD<br>Stefan Weikl, MD<br>Irene Marthe Lang, MD<br>Kurt Huber, MD<br>Gabriele, Jakl-Kotauschek, MD                                                                                                                                                                                                                                                      | Gudrun Steinmaurer<br>Max-Paul Winter, MD<br>Tijana, Andric, MD<br>Maximilian, Tscharre, MD<br>Claudia, Wegmayr, MSc<br>Bernhard, Jäger, MD<br>Florian, Egger, MD                     | Graz<br>Vienna<br>Vienna                               | LKH Graz West Austria (35)<br>Medical University of Vienna, Department of Cardiology (8)<br>Wilhelminen Hospital Vienna (7)                                                                                                 |
| <b>Hungary (49)</b><br>Country Leader<br>Matyas Keltai, MD, PhD, DSc                                              | Andras Vertes, MD<br>Albert Varga, MD, PhD<br>Geza Fontos, MD<br>Bela Merkely, MD, PhD, DSc<br>Gabor Kerecsen, MD                                                                                                                                                                                                                                                          | Judit Sebo, MD<br>Zoltan Davidovits, MD<br>Laszlone Matics<br>Gergely Agoston, MD<br>Gabor Dekany, MD<br>Andrea Bartykowszki, MD<br>Pal Maurovich-Horvat, MD, PhD, MPH<br>Agnes Jakal | Budapest<br>Szeged<br>Budapest<br>Budapest<br>Budapest | Eszszk- Szent Istvan Hospital (20)<br>University of Szeged (12)<br>George Gottsegen National Institute of Cardiology (9)<br>Heart and Vascular Center, Semmelweis University (8)<br>Military Hospital, Budapest (1)         |
| <b>Serbia (47)</b>                                                                                                | Sasa Hinic, MD, BSc<br>Marija Zdravkovic, MD, PhD<br>Vladan Mudrenovic, MD<br>Bogdan Crnokrak, MD                                                                                                                                                                                                                                                                          | Jelena Djokic, MD                                                                                                                                                                     | Belgrade                                               | University Hospital Center Bezanijska Kosa (13)                                                                                                                                                                             |

| Country (No. Randomizations)                                                                                                                                 | Investigator(s)                                                                                                                                                                                                                                                                                                                                                                                                                                                                    | Study Coordinator(s)                                                                                                                                                                                                                                                                                                              | City & State (if applicable)                                                                           | Institution (No. Randomizations)                                                                                                                                                                                                            |
|--------------------------------------------------------------------------------------------------------------------------------------------------------------|------------------------------------------------------------------------------------------------------------------------------------------------------------------------------------------------------------------------------------------------------------------------------------------------------------------------------------------------------------------------------------------------------------------------------------------------------------------------------------|-----------------------------------------------------------------------------------------------------------------------------------------------------------------------------------------------------------------------------------------------------------------------------------------------------------------------------------|--------------------------------------------------------------------------------------------------------|---------------------------------------------------------------------------------------------------------------------------------------------------------------------------------------------------------------------------------------------|
|                                                                                                                                                              | Branko D. Beleslin, MD, PhD<br>Nikola N. Boskovic, MD<br>Marija T. Petrovic, MD<br>Milan R. Dobric, MD<br>Zeljko Z. Markovic, MD, PhD<br>Ana S. Mladenovic, MD, PhD                                                                                                                                                                                                                                                                                                                | Ana D. Djordjevic-Dikic, MD, PhD<br>Vojislav L. Giga, MD, PhD<br>Jelena J. Stepanovic, MD, PhD                                                                                                                                                                                                                                    | Belgrade                                                                                               | Faculty of Medicine, University of Belgrade; Cardiology Clinic, Clinical Center of Serbia (10)                                                                                                                                              |
|                                                                                                                                                              | Nada Cemerlic-Adjic, MD                                                                                                                                                                                                                                                                                                                                                                                                                                                            | Lazar Velicki, MD<br>Ljiljana Pupic                                                                                                                                                                                                                                                                                               | Sremska Kamenica                                                                                       | Institute of Cardiovascular Diseases Vojvodina, Sremska Kamenica, Serbia and Faculty of Medicine, University of Novi Sad (9)                                                                                                                |
|                                                                                                                                                              | Goran Davidović, MD, PhD<br>Rada Vučić, MD                                                                                                                                                                                                                                                                                                                                                                                                                                         | Stefan M. Simović, MD                                                                                                                                                                                                                                                                                                             | Kragujevac                                                                                             | Clinical Center Kragujevac (7)                                                                                                                                                                                                              |
|                                                                                                                                                              | Milica Nikola Dekleva, MD PhD                                                                                                                                                                                                                                                                                                                                                                                                                                                      | Miroslav Stevo Martinovic, MD<br>Gordana Stevanovic                                                                                                                                                                                                                                                                               | Belgrade                                                                                               | University Clinical Hospital Zvezdara (6)                                                                                                                                                                                                   |
|                                                                                                                                                              | Goran Stankovic, MD                                                                                                                                                                                                                                                                                                                                                                                                                                                                | Milan Dobric                                                                                                                                                                                                                                                                                                                      | Belgrade                                                                                               | Clinical Center of Serbia (1)                                                                                                                                                                                                               |
|                                                                                                                                                              | Svetlana Apostolovic, MD                                                                                                                                                                                                                                                                                                                                                                                                                                                           | Sonja Salinger Martinovic<br>Dragana Stanojevic                                                                                                                                                                                                                                                                                   | Nis                                                                                                    | Clinic for Cardiovascular Diseases, Clinical Center Nis (1)                                                                                                                                                                                 |
| <b>Mexico (46)</b>                                                                                                                                           | Jorge Escobedo, MD<br>Rubén Baleón-Espinosa, MD<br>Arturo S Campos-Santaolalla, MD<br>Elihu Durán-Cortés, MD<br>José M Flores-Palacios, MD<br>Andrés García-Rincón, MD<br>Moisés Jiménez-Santos, MD<br>Joaquín V Peñafiel, MD<br>José A Ortega-Ramírez, MD<br>Aquilés Valdespino-Estrada, MD                                                                                                                                                                                       | Ramon de Jesús-Pérez, RN                                                                                                                                                                                                                                                                                                          | Benito Juarez                                                                                          | Instituto Mexicano del Seguro Social (35)                                                                                                                                                                                                   |
|                                                                                                                                                              | Erick Alexanderson Rosas, MD                                                                                                                                                                                                                                                                                                                                                                                                                                                       | María Fernanda Canales Brassetti, MD<br>Diego Adrián Vences Anaya, MD<br>María Pérez García<br>Isabel Estela Carvajal Juarez, MD<br>Magdalena Madero Rovalo, MC<br>Erick Donato Morales Rodriguez, MD                                                                                                                             | Mexico City                                                                                            | Instituto Nacional de Cardiología "Ignacio Chávez" (11)                                                                                                                                                                                     |
| <b>Australia (45)</b><br>Country Leaders<br>Joseph B. Selvanayagam, MBBS (Hons), DPhil<br>Jamie Rankin, MBBS (past)<br>Country Coordinator<br>Deirdre Murphy | Joseph B. Selvanayagam, MBBS (Hons), DPhil<br>Majo X. Joseph, MBBS<br>Suku T. Thambar, MBBS<br>John F. Beltrame, MD<br>Graham S. Hillis, PhD                                                                                                                                                                                                                                                                                                                                       | Sau Lee, PhD<br>Prince Thomas, RN<br>Melissa D Chaplin, RN<br>Stephanie C Boer, B Biotechnology (Honours)<br>Jeanette K. Stansborough, RN<br>Marilyn Black, RN<br>Michelle M. Bonner, B. Nursing<br>Kim F. Ireland, RN<br>Clare Venn-Edmonds, RN                                                                                  | Adelaide<br>New Lambton Heights<br>Woodville South<br>Perth                                            | Flinders Medical Centre (30)<br>John Hunter Hospital (8)<br>The Queen Elizabeth Hospital (5)<br>Royal Perth Hospital (2)                                                                                                                    |
| <b>France (42)</b><br>Country Leader<br>Philippe-Gabriel Steg, MD<br>Country Coordinators<br>Helene Abergel<br>Jean-Michel Juliard                           | Christophe Thuaire, MD<br>Téodora Dutoiu, MD<br>Philippe Gabriel Steg, MD<br>Jean-Michel Juliard, MD<br>Michel S. Slamá, MD<br>Rami El Mahmoud, MD<br>Eric Nicollet, MD<br>Pascal Goube, MD<br>Gilles Barone-Rochette, MD<br>Alain Furber, MD<br>Loïc Bière, MD                                                                                                                                                                                                                    | Corine Thobois, RN<br>Emilie Tachot, RN<br>Christophe Laure, RN<br>Christel Vassaliere, RN<br>Helene Abergel, MSc<br>Axelle Fuentes, MSc<br>Ludivine Eliahou, MD<br>Olivier Dubourg, MD<br>Pierre Michaud, MD<br>Sarah Hadjih<br>Patricia Brito<br>Gilles Barone-Rochette<br>Charles Cornet, MD, PhD<br>Jeremy Rautureau, MD, PhD | Chartres<br>Paris<br>Clamart Cedex<br>Boulogne<br>Corbeil-Essonnes Cedex<br>Grenoble<br>Angers Cedex 9 | C.H. Louis Pasteur (21)<br>Bichat Hospital (9)<br>Antoine-Becclere Hospital (5)<br>Ambroise Pare Hospital (2)<br>Centre Hospitalier Sud Francilien (2)<br>Grenoble University Hospital (2)<br>Centre Hospitalier Universitaire d'Angers (1) |
| <b>Lithuania (39)</b>                                                                                                                                        | Aleksandras Laucevicius, MD<br>Jelena Celutkienė, MD                                                                                                                                                                                                                                                                                                                                                                                                                               | Agne Juceviciene, MD<br>Irma Kalibaitė-Rutkauskienė, MD<br>Laura Keinaite<br>Monika Laukyte<br>Gelmina Mikolaitiene<br>Akvilė Smigelskaite, MD<br>Ilona Tamasauskiene, MD<br>Agne Urboniene, MD                                                                                                                                   | Vilnius                                                                                                | Vilnius University Hospital Santariskes Clinic (39)                                                                                                                                                                                         |
| <b>*Netherlands (37)</b>                                                                                                                                     | Elvin Kedhi MD, PhD<br>Jorik Timmer, MD<br>Rik Hermanides, MD<br>Eliza Kaplan, MD<br>Robert K. Riezebos, MD, PhD<br>Pouneh Samadi, MD<br>Elise van Dongen, MD<br>Sander R. Niehe, MD<br>Harry Suryapranata, MD<br>Stijn van Vugt, MD, PhD                                                                                                                                                                                                                                          | Ilse Bouwhuis<br>Lia Nijmeijer<br>Jeannette, J. M. Schoep, RN<br>Elisabeth, M. Janzen, RN<br>Sandra Ahoud                                                                                                                                                                                                                         | Zwolle<br>Amsterdam<br>Nijmegen                                                                        | Isala Klinieken (25)<br>Cardio Research Hartcentrum OLVG (11)<br>Radboudumc (1)                                                                                                                                                             |
| <b>Portugal (33)</b>                                                                                                                                         | Ruben Ramos, MD<br>Duarte Caceła, MD<br>Ana Santana, MD<br>Antonio Fiarregga, MD<br>Lidia Sousa, MD<br>Hugo Marques, MD<br>Lino Patricio, MD<br>Luis Bermanrdes, MD<br>Pedro Rio, MD<br>Ramiro Carvalho, MD<br>Rui Ferreira, MD<br>Tiago Silva, MD<br>Ines Rodrigues, MD<br>Pedro Modas, MD<br>Guilherme Portugal, MD<br>Jose Fragata, MD<br>Fausto J. Pinto, PhD<br>Miguel Nobre Menezes, MD<br>Guilhermina Cantinho Lopes, MD<br>Ana Gomes Almeida, PhD<br>Pedro Canas Silva, MD | Mafalda Selas<br>Filipa Silva<br>Cláudia Freixo<br>Inês Zimbarra Cabrita, PhD<br>Andreia Rocha, MSc<br>Francisca Patuleia Figueiras, PhD<br>Andreia Coelho, BSc<br>Marta Capinha                                                                                                                                                  | Lisbon                                                                                                 | Hospital de Santa Marta (25)<br>Santa Maria University Hospital, Cardiology Department, CHLN (6)                                                                                                                                            |

| Country<br>(No. Randomizations)                                                                                                           | Investigator(s)                                                                                                                                                                                                                                                                                                                                            | Study Coordinator(s)                                                                                                                                   | City & State<br>(if applicable)                                                             | Institution (No. Randomizations)                                                                                                                                                                                                |
|-------------------------------------------------------------------------------------------------------------------------------------------|------------------------------------------------------------------------------------------------------------------------------------------------------------------------------------------------------------------------------------------------------------------------------------------------------------------------------------------------------------|--------------------------------------------------------------------------------------------------------------------------------------------------------|---------------------------------------------------------------------------------------------|---------------------------------------------------------------------------------------------------------------------------------------------------------------------------------------------------------------------------------|
|                                                                                                                                           | Angelo Nobre, MD<br>Ana Rita Francisco, MD<br>Nuno Ferreira, MD<br>Ricardo L. Lopes, MD                                                                                                                                                                                                                                                                    | Maria Inés Caetano<br>Susana Silva                                                                                                                     | Vila Nova de Gaia                                                                           | Centro Hospitalar de Vila Nova de Gaia/Espinho, EPE (2)                                                                                                                                                                         |
| <b>Argentina (29)</b><br>Country Leader<br>Rafael Diaz, MD (past)                                                                         | Luis Guzman, MD<br>Julio César Figal, MD<br>Oscar Méndiz, MD<br>Claudia Cortés, MD<br>Roberto René Favaloro, MD<br>Carlos Alvarez, MD<br>Javier Courtis, MD<br>Gabriela Zeballos, MD<br>Lilia Schiavi, MD<br>Mariano Rubio, MD                                                                                                                             | Veronica Tinnirello<br>Matías Nicolás Mungo<br>Marina García<br>Valeria Godoy<br>María Victoria Actis<br>Graciela Scaro, MD                            | Cordoba<br>Ciudad Autónoma de Buenos Aires<br>Bahia Blanca<br>Cordoba<br>Cordoba<br>Cordoba | Instituto Medico DAMIC (11)<br>Fundación Favaloro (10)<br>Hospital Italiano Regional del Sur Bahia Blanca (3)<br>Clinica Romagosa and Clinica De La Familia (2)<br>Clinica Del Prado (2)<br>Clinica Privada Vélez Sarsfield (1) |
| <b>*New Zealand (28)</b><br>Country Leader<br>Harvey Douglas White, MD<br>Country Coordinator<br>Caroline Alsweller                       | Gerard Patrick Devlin, MD<br>Raewyn Fisher, MD<br>Ralph Alan Huston Stewart, MCChB, MD<br>Harvey Douglas White, MD<br>Jocelyne Benatar, MD                                                                                                                                                                                                                 | Liz Low, RN<br>Jayne Scales, RN<br>Kirsty Abercrombie, RN<br>Leah Howell, RN<br>Cathrine Patten, RN                                                    | Hamilton<br>Auckland                                                                        | Waikato Hospital (22)<br>Auckland City Hospital (6)                                                                                                                                                                             |
| <b>*Macedonia (28)</b>                                                                                                                    | Sasko Kedev, MD, PhD<br>Irena Peovska Mitevka, MD, PhD<br>Elizabeta Srbinska Kostovska, MD, PhD<br>Hristo Pejkov, MD, PhD                                                                                                                                                                                                                                  |                                                                                                                                                        | Skopje                                                                                      | University Clinic of Cardiology (28)                                                                                                                                                                                            |
| <b>*Sweden (23)</b><br>Country Leader<br>Claes Held, MD, PhD                                                                              | Claes Held, MD, PhD<br>Kai Eggers, MD, PhD<br>Gunnar Frostfelt, MD, PhD<br>Nina Johnston, MD, PhD<br>Maciej Olsowka, MD<br>Axel Åkerblom, MD, PhD<br>Inga Soveri, MD, PhD<br>Johannes Asperg, MD                                                                                                                                                           | Christina Björklund, RN<br>Maria Andreasson, RN<br>Marie Essermark, RN<br>Liselotte Persson                                                            | Uppsala<br>Stockholm                                                                        | Uppsala University (18)<br>Karolinska Institutet at Danderyd Hospital (5)                                                                                                                                                       |
| <b>Israel (15)</b><br>Country Leaders<br>Rafael Beyar, MD, MD, DSc, MPH<br>Tali Sharir, MD<br>Country Coordinator<br>Eugenia Nikolsky, MD | Tali Sharir, MD<br>Dan Elian, MD<br>Arthur Kerner, MD<br>Samia Massalha, MD                                                                                                                                                                                                                                                                                | Or Harel, MA<br>Margalit Bentzvi<br>Ludmila Helmer                                                                                                     | Tel-Aviv<br>Haifa                                                                           | Assuta Medical Centers (9)<br>Rambam Medical Center (6)                                                                                                                                                                         |
| <b>Japan (14)</b><br>Country Leader<br>Shun Kohsaka, MD                                                                                   | Keiichi Fukuda, MD, PhD<br>Shun Kohsaka, MD<br>Satoshi Yasuda, MD, PhD<br>Shigeyuki Nishimura, MD                                                                                                                                                                                                                                                          | Ikuko Ueda, PhD<br>Jun Fujita, MD<br>Akemi Furukawa, RN<br>Kanae Hirase, RN<br>Toshiyuki Nagai, MD, PhD<br>Fumiyuki Otsuka, MD, PhD<br>Shintaro Nakano | Shinjuku-ku<br>Suita-shi<br>Hidaka                                                          | Keio University (7)<br>National Cerebral and Cardiovascular Center (4)<br>Saitama Medical University (3)                                                                                                                        |
| <b>*Belgium (7)</b><br>Country Leader<br>Frans Van de Werf, MD, PhD<br>Country Coordinator<br>Kaatje Goetschalckx, MD                     | Kaatje Goetschalckx, MD<br>Frans Van de Werf, PhD, MD<br>Kathleen Claes, PhD, MD                                                                                                                                                                                                                                                                           | Valerie Robesyn                                                                                                                                        | Leuven                                                                                      | University Hospital Leuven (7)                                                                                                                                                                                                  |
| <b>*Taiwan (7)</b><br>Country Leader<br>Harvey Douglas White, MD<br>Country Coordinator<br>Caroline Alsweller                             | Chung-Lieh Hung, MD<br>Chun-Ho Yun, MD<br>Charles Jia-Yin Hou, MD<br>Jen-Yuan Kuo, MD<br>Hung-I Yeh, MD, PhD<br>Ta-Chuan Hung, MD<br>Jiun-Yi Li, MD, PhD<br>Chen-Yen Chien, MD, PhD<br>Cheng-Ting Tsai, MD<br>Chun-Chieh Liu, MD<br>Fa-Chang Yu, MD<br>Yueh-Hung Lin, MD<br>Wei-Ren Lan, MD<br>Chih-Hsuan Yen, MD<br>Jui-Peng Tsai, MD<br>Kuo-Tzu Sung, MD | Yi-Hsuan Yang                                                                                                                                          | Taipei City                                                                                 | Mackay Memorial Hospital (7)                                                                                                                                                                                                    |
| <b>*South Africa (7)</b>                                                                                                                  | Mpiko Ntsekhe, MD<br>Shaheen Pandie, MD<br>Charle A Viljoen, MD<br>Marianne De Andrade, MD                                                                                                                                                                                                                                                                 | Constance Philander (Nee Talliard), ND<br>Noloyiso Mtana, RN                                                                                           | Cape Town                                                                                   | Groote Schuur Hospital / University of Cape Town (7)                                                                                                                                                                            |
| <b>*Switzerland (7)</b><br>Country Leader<br>Aldo P. Maggioni, MD                                                                         | Tiziano Moccetti, MD<br>M. Grazia Rossi, MD                                                                                                                                                                                                                                                                                                                | Adriana Anesini, RN<br>Simona Maspoli, RN<br>Manuela Mombelli, RN                                                                                      | Lugano                                                                                      | Cardiocentro (7)                                                                                                                                                                                                                |
| <b>Egypt (6)</b>                                                                                                                          | Magdy Abdelhamid, MD<br>Ahmed Adel, MD<br>Ahmed Kamal, MsC<br>Hossam Mahrous, MD                                                                                                                                                                                                                                                                           | Ahmed Talaat, MD                                                                                                                                       | Cairo                                                                                       | Cairo University (6)                                                                                                                                                                                                            |

| Country<br>(No. Randomizations)                                                                                 | Investigator(s)                                                                                                                                                                                                                                          | Study Coordinator(s)                                                                                                     | City & State<br>(if applicable) | Institution (No. Randomizations)                                             |
|-----------------------------------------------------------------------------------------------------------------|----------------------------------------------------------------------------------------------------------------------------------------------------------------------------------------------------------------------------------------------------------|--------------------------------------------------------------------------------------------------------------------------|---------------------------------|------------------------------------------------------------------------------|
| <b>Romania (5)</b>                                                                                              | Sameh El Kaffas, MD<br>Hussien El Fishawy, MD                                                                                                                                                                                                            |                                                                                                                          |                                 |                                                                              |
|                                                                                                                 | Calin Pop, MD, PhD<br>Matei Claudia, MD, PhD                                                                                                                                                                                                             |                                                                                                                          | Bucharest                       | Emergency County Hospital Baia Mare (4)                                      |
| <b>*Saudi Arabia (5)</b>                                                                                        | Bogdan A. Popescu, MD, PhD<br>Carmen Ginghina, MD, PhD<br>Dan Deleanu, MD, PhD<br>Vlad A. Iliescu, MD, PhD                                                                                                                                               | Monica Rosca, MD, PhD<br>Carmen C. Beladan, MD, PhD                                                                      | Bucharest                       | Emergency Institute of Cardiovascular Diseases "Prof. Dr. C. C. Iliescu" (1) |
|                                                                                                                 | Mouaz H. Al-Mallah, MD MSc<br>Ahmed Aljzeeri, MD<br>Hani Najm, MD<br>Ali Alghamdi, MD                                                                                                                                                                    | Sarah Zahrani, RN                                                                                                        | Central Province                | King AbdulAziz Cardiac Center (5)                                            |
| <b>*Peru (4)</b>                                                                                                | Walter Enrique Mogrovejo Ramos, MD                                                                                                                                                                                                                       | Marco Antonio Monsalve Davila, RN                                                                                        | Miraflores                      | Instituto Neuro Cardiovascular De Las Americas (4)                           |
| <b>Thailand (3)</b><br>Country Leader<br>Harvey Douglas White, MD<br>Country Coordinator<br>Caroline Alsweller  | Srun Kuanprasert, MD<br>Arintaya Prommintikul, MD<br>Weerachai Nawarawong, MD<br>Surin Woragidpoonpol, MD<br>Thitipong Tepsuwan, MD<br>Noppon Taksaudom, MD<br>Chataroon Rimsukcharoenchai, MD<br>Juntima Euathrongchit, MD<br>Yutthaphan Wannasopha, MD | Supatchara Khwakhong, RN<br>Anong Chaiyasri, RN<br>Warangkana Mekara, RN<br>Supap Kulthawong, RN<br>Anong Amaratamol, RN | Chiang Mai                      | Maharaj Nakorn Chiang Mai Hospital (2)                                       |
|                                                                                                                 | Sukit Yamwong, MD<br>Piyamitr Sritara, MD<br>Suthara Aramcharoen, MD<br>Krissada Meemuk, MD                                                                                                                                                              | Pachara Panpunuan, RN                                                                                                    | Bangkok                         | Ramathibodi Hospital (1)                                                     |
| <b>*Malaysia (2)</b><br>Country Leader<br>Harvey Douglas White, MD<br>Country Coordinator<br>Caroline Alsweller | Ahmad Khairuddin, MD<br>Hafidz Abd Hadi, MD<br>Shaiful Azmi Yahaya, MD                                                                                                                                                                                   | Noor Syamira Mokhtar, RN<br>Nor Asiah Basri, RN<br>Irni Yusnida, RN<br>Humayrah Hashim                                   | Kuala Lumpur                    | Institut Jantung Negara (2)                                                  |

\* Countries participated in Economics Quality of Life (EQoL) Questionnaires

\*\*This site received one participant in transfer that was randomized at another site
